# Supplementary material for: Protein Networks Associated with Native Metabotropic Glutamate 1 Receptors (mGlu1) in the Mouse Cerebellum
Source: MDPI journal article supplement (doi:10.3390/cells12091325), 2023-05-05
Supplement: s1 [file s1]

A

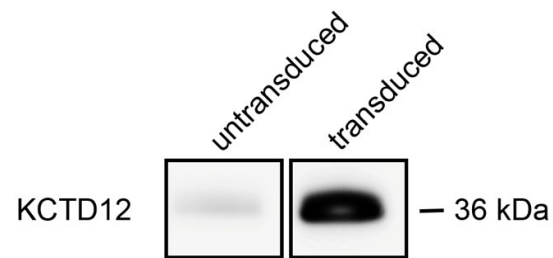

B

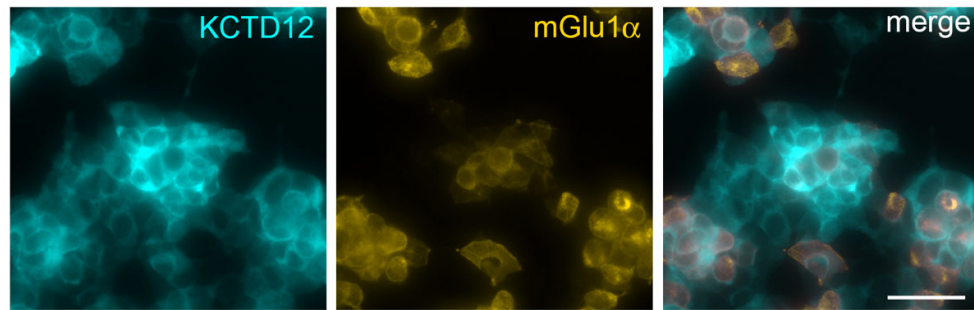

**Supplementary Figure S1.** Overexpression of mouse KCTD12 and mGlu1α in HEK293 cells. A: Western blot on whole-cell lysates (1μg) of untransduced and KCTD12 stably-overexpressing HEK293 cells. Native untransduced HEK293 cells show low levels of endogenous human KCTD12 expression. B: Fluorescence images of KCTD12-overexpressing HEK293 cells transiently transfected with mGlu1α. Scale bar:50 μm.
