# Supplementary material for: Protein Networks Associated with Native Metabotropic Glutamate 1 Receptors (mGlu1) in the Mouse Cerebellum
Source: MDPI journal article supplement (doi:10.3390/cells12091325), 2023-05-05
Supplement: s1 [file s1]

### Supplementary Table S3: list of proteins identified in 4 out of 6 immunoprecipitation replicate experiments

Proteins identified in six replicate experiments are shown in bold.

| Entry         | Entry name         | Protein names                                                           | Gene names                    | Organism            | Length      |
|---------------|--------------------|-------------------------------------------------------------------------|-------------------------------|---------------------|-------------|
| P68510        | 1433F_MOUSE        | 14-3-3 protein eta                                                      | Ywhah                         | Mus musculus        | 246         |
| <b>P61982</b> | <b>1433G_MOUSE</b> | <b>14-3-3 protein gamma</b>                                             | <b>Ywhag</b>                  | <b>Mus musculus</b> | <b>247</b>  |
| <b>P68254</b> | <b>1433T_MOUSE</b> | <b>14-3-3 protein theta</b>                                             | <b>Ywhaq</b>                  | <b>Mus musculus</b> | <b>245</b>  |
| <b>P16330</b> | <b>CN37_MOUSE</b>  | <b>2',3'-cyclic-nucleotide 3'-phosphodiesterase</b>                     | <b>Cnp Cnp1</b>               | <b>Mus musculus</b> | <b>420</b>  |
| <b>P48962</b> | <b>ADT1_MOUSE</b>  | <b>ADP/ATP translocase 1</b>                                            | <b>Slc25a4 Aac1 Anc1 Ant1</b> | <b>Mus musculus</b> | <b>298</b>  |
| P51881        | ADT2_MOUSE         | ADP/ATP translocase 2                                                   | Slc25a5 Aac2 Ant2             | Mus musculus        | 298         |
| <b>Q91VR2</b> | <b>ATPG_MOUSE</b>  | <b>ATP synthase subunit gamma, mitochondrial</b>                        | <b>Atp5f1c Atp5c1</b>         | <b>Mus musculus</b> | <b>298</b>  |
| <b>Q6WVG3</b> | <b>KCD12_MOUSE</b> | <b>BTB/POZ domain-containing protein KCTD12</b>                         | <b>Kctd12 Pfet1</b>           | <b>Mus musculus</b> | <b>327</b>  |
| <b>P28652</b> | <b>KCC2B_MOUSE</b> | <b>Calcium/calmodulin-dependent protein kinase type II subunit beta</b> | <b>Camk2b Camk2d</b>          | <b>Mus musculus</b> | <b>542</b>  |
| Q0VF55        | Q0VF55_MOUSE       | Calcium-transporting ATPase                                             | Atp2b3                        | Mus musculus        | 1220        |
| Q1RLL3        | CPNE9_MOUSE        | Copine-9                                                                | Cpne9                         | Mus musculus        | 553         |
| Q62425        | NDUA4_MOUSE        | Cytochrome c oxidase subunit NDUF4                                      | Ndufa4                        | Mus musculus        | 82          |
| O08553        | DPYL2_MOUSE        | Dihydropyrimidinase-related protein 2                                   | Dpysl2 Crmp2 Ulip2            | Mus musculus        | 572         |
| <b>P56564</b> | <b>EAA1_MOUSE</b>  | <b>Excitatory amino acid transporter 1</b>                              | <b>Slc1a3 Eaat1 Gmt1</b>      | <b>Mus musculus</b> | <b>543</b>  |
| P43006        | EAA2_MOUSE         | Excitatory amino acid transporter 2                                     | Slc1a2 Eaat2 Glt1             | Mus musculus        | 572         |
| <b>O35544</b> | <b>EAA4_MOUSE</b>  | <b>Excitatory amino acid transporter 4</b>                              | <b>Slc1a6 Eaat4</b>           | <b>Mus musculus</b> | <b>561</b>  |
| <b>Q61625</b> | <b>GRID2_MOUSE</b> | <b>Glutamate receptor ionotropic, delta-2</b>                           | <b>Grid2</b>                  | <b>Mus musculus</b> | <b>1007</b> |
| P16858        | G3P_MOUSE          | Glyceraldehyde-3-phosphate dehydrogenase                                | Gapdh Gapd                    | Mus musculus        | 333         |
| <b>P62874</b> | <b>GBB1_MOUSE</b>  | <b>Guanine nucleotide-binding protein G(I)/G(S)/G(T) subunit beta-1</b> | <b>Gnb1</b>                   | <b>Mus musculus</b> | <b>340</b>  |
| P62880        | GBB2_MOUSE         | Guanine nucleotide-binding protein G(I)/G(S)/G(T) subunit beta-2        | Gnb2                          | Mus musculus        | 340         |
| <b>P18872</b> | <b>GNAO_MOUSE</b>  | <b>Guanine nucleotide-binding protein G(o) subunit alpha</b>            | <b>Gnao1 Gna0 Gnao</b>        | <b>Mus musculus</b> | <b>354</b>  |
| P21279        | GNAQ_MOUSE         | Guanine nucleotide-binding protein G(q) subunit alpha                   | Gnaq                          | Mus musculus        | 359         |
| <b>Q99JP6</b> | <b>HOME3_MOUSE</b> | <b>Homer protein homolog 3 (Homer-3)</b>                                | <b>Homer3</b>                 | <b>Mus musculus</b> | <b>356</b>  |
| <b>P11881</b> | <b>ITPR1_MOUSE</b> | <b>Inositol 1,4,5-trisphosphate receptor type 1</b>                     | <b>Itpr1 Insp3r Pcd6 Pcp1</b> | <b>Mus musculus</b> | <b>2749</b> |
| <b>Q7TNC9</b> | <b>I5P1_MOUSE</b>  | <b>Inositol polyphosphate-5-phosphatase A</b>                           | <b>Inpp5a</b>                 | <b>Mus musculus</b> | <b>412</b>  |
| <b>P97772</b> | <b>GRM1_MOUSE</b>  | <b>Metabotropic glutamate receptor 1</b>                                | <b>Grm1 Gprc1a Mglur1</b>     | <b>Mus musculus</b> | <b>1199</b> |

|        |              |                                                                                |                           |              |      |
|--------|--------------|--------------------------------------------------------------------------------|---------------------------|--------------|------|
| P35802 | GPM6A_MOUSE  | Neuronal membrane glycoprotein M6-a                                            | Gpm6a M6a                 | Mus musculus | 278  |
| P99029 | PRDX5_MOUSE  | Peroxisomal oxidoreductase 5, mitochondrial                                    | Prdx5 Prdx6               | Mus musculus | 210  |
| Q8VEM8 | MPCP_MOUSE   | Phosphate carrier protein, mitochondrial                                       | Slc25a3                   | Mus musculus | 357  |
| Q9ES52 | SHIP1_MOUSE  | Phosphatidylinositol 3,4,5-trisphosphate 5-phosphatase 1                       | Inpp5d 7a33, Ship, Ship1  | Mus musculus | 1191 |
| G5E829 | AT2B1_MOUSE  | Plasma membrane calcium-transporting ATPase 1                                  | Atp2b1                    | Mus musculus | 1220 |
| O35449 | PRRT1_MOUSE  | Proline-rich transmembrane protein 1                                           | Prrt1 Ng5                 | Mus musculus | 306  |
| P63318 | KPCG_MOUSE   | Protein kinase C gamma type                                                    | Prkcg Pkcc, Pkcg, Prkcc   | Mus musculus | 697  |
| P35486 | ODPA_MOUSE   | Pyruvate dehydrogenase E1 component subunit alpha, somatic form, mitochondrial | Pdha1 Pdha-1              | Mus musculus | 390  |
| Q8BW86 | ARG33_MOUSE  | Rho guanine nucleotide exchange factor 33                                      | Arhgef33 Gm941            | Mus musculus | 850  |
| Q64518 | AT2A3_MOUSE  | Sarcoplasmic/endoplasmic reticulum calcium ATPase 3                            | Atp2a3                    | Mus musculus | 999  |
| B1ATV3 | B1ATV3_MOUSE | Short transient receptor potential channel 3                                   | Trpc3 CT7-314H19.1-001    | Mus musculus | 910  |
| P31648 | SC6A1_MOUSE  | Sodium- and chloride-dependent GABA transporter 1                              | Slc6a1 Gabt1, Gat-1, Gat1 | Mus musculus | 599  |
| Q6PIE5 | AT1A2_MOUSE  | Sodium/potassium-transporting ATPase subunit alpha-2                           | Atp1a2                    | Mus musculus | 1020 |
| Q6PIC6 | AT1A3_MOUSE  | Sodium/potassium-transporting ATPase subunit alpha-3                           | Atp1a3                    | Mus musculus | 1013 |
| P14094 | AT1B1_MOUSE  | Sodium/potassium-transporting ATPase subunit beta-1                            | Atp1b1 Atp4b              | Mus musculus | 304  |
| Q91V14 | S12A5_MOUSE  | Solute carrier family 12 member 5                                              | Slc12a5 Kcc2 Kiaa1176     | Mus musculus | 1138 |
| P46097 | SYT2_MOUSE   | Synaptotagmin-2                                                                | Syt2                      | Mus musculus | 422  |
| P61264 | STX1B_MOUSE  | Syntaxin-1B                                                                    | Stx1b Stx1b1 Stx1b2       | Mus musculus | 288  |
| P01831 | THY1_MOUSE   | Thy-1 membrane glycoprotein                                                    | Thy1 Thy-1                | Mus musculus | 162  |
| P68369 | TBA1A_MOUSE  | Tubulin alpha-1A chain                                                         | Tuba1a Tuba1              | Mus musculus | 451  |
| Q60932 | VDAC1_MOUSE  | Voltage-dependent anion-selective channel protein 1 (VDAC-1)                   | Vdac1 Vdac5               | Mus musculus | 296  |
