# Supplementary material for: Protein Networks Associated with Native Metabotropic Glutamate 1 Receptors (mGlu1) in the Mouse Cerebellum
Source: MDPI journal article supplement (doi:10.3390/cells12091325), 2023-05-05
Supplement: s1 [file s1]

## Supplementary Table S2: complete list of proteins identified in immunoprecipitation experiments.

Proteins indentified in six replicate experiments are shown in bold.

| Entry         | Entry name         | Protein names                                             | Gene names                                                        | Organism            | Length     |
|---------------|--------------------|-----------------------------------------------------------|-------------------------------------------------------------------|---------------------|------------|
| Q9CQV8        | 1433B_MOUSE        | 14-3-3 protein beta/alpha                                 | Ywhab                                                             | Mus musculus        | 246        |
| P62259        | 1433E_MOUSE        | 14-3-3 protein epsilon                                    | Ywhae                                                             | Mus musculus        | 255        |
| P68510        | 1433F_MOUSE        | 14-3-3 protein eta                                        | Ywhah                                                             | Mus musculus        | 246        |
| <b>P61982</b> | <b>1433G_MOUSE</b> | <b>14-3-3 protein gamma</b>                               | <b>Ywhag</b>                                                      | <b>Mus musculus</b> | <b>247</b> |
| <b>P68254</b> | <b>1433T_MOUSE</b> | <b>14-3-3 protein theta</b>                               | <b>Ywhaq</b>                                                      | <b>Mus musculus</b> | <b>245</b> |
| P63101        | 1433Z_MOUSE        | 14-3-3 protein zeta/delta                                 | Ywhaz                                                             | Mus musculus        | 245        |
| Q9Z1T6        | FYV1_MOUSE         | 1-phosphatidylinositol 3-phosphate 5-kinase               | Pikfyve Fab1 Kiaa0981 Pip5k3                                      | Mus musculus        | 2097       |
| Q91UZ1        | Q91UZ1_MOUSE       | 1-phosphatidylinositol 4,5-bisphosphate phosphodiesterase | Plcb4                                                             | Mus musculus        | 1175       |
| <b>P16330</b> | <b>CN37_MOUSE</b>  | <b>2',3'-cyclic-nucleotide 3'-phosphodiesterase</b>       | <b>Cnp Cnp1</b>                                                   | <b>Mus musculus</b> | <b>420</b> |
| Q60597        | ODO1_MOUSE         | 2-oxoglutarate dehydrogenase, mitochondrial               | Ogdh Kiaa4192                                                     | Mus musculus        | 1023       |
| P61922        | GABT_MOUSE         | 4-aminobutyrate aminotransferase, mitochondrial           | Abat Gabat                                                        | Mus musculus        | 500        |
| P63038        | CH60_MOUSE         | 60 kDa heat shock protein, mitochondrial                  | Hspd1 Hsp60                                                       | Mus musculus        | 573        |
| Q8QZT1        | THIL_MOUSE         | Acetyl-CoA acetyltransferase, mitochondrial               | Acat1                                                             | Mus musculus        | 424        |
| Q5SWU9        | ACACA_MOUSE        | Acetyl-CoA carboxylase 1                                  | Acaca Acac, Gm738                                                 | Mus musculus        | 2345       |
| Q99KI0        | ACON_MOUSE         | Aconitate hydratase, mitochondrial                        | Aco2                                                              | Mus musculus        | 780        |
| P68033        | ACTC_MOUSE         | Actin, alpha cardiac muscle 1                             | Actc1 Actc                                                        | Mus musculus        | 377        |
| P60710        | ACTB_MOUSE         | Actin, cytoplasmic 1 (Beta-actin)                         | Actb                                                              | Mus musculus        | 375        |
| P63260        | ACTG_MOUSE         | Actin, cytoplasmic 2 (Gamma-actin)                        | Actg1 Actg                                                        | Mus musculus        | 375        |
| <b>P48962</b> | <b>ADT1_MOUSE</b>  | <b>ADP/ATP translocase 1</b>                              | <b>Slc25a4 Aac1 Anc1 Ant1</b>                                     | <b>Mus musculus</b> | <b>298</b> |
| P51881        | ADT2_MOUSE         | ADP/ATP translocase 2                                     | Slc25a5 Aac2 Ant2                                                 | Mus musculus        | 298        |
| P84084        | ARF5_MOUSE         | ADP-ribosylation factor 5                                 | Arf5                                                              | Mus musculus        | 180        |
| P07724        | ALBU_MOUSE         | Albumin                                                   | Alb Alb-1 Alb1                                                    | Mus musculus        | 608        |
| Q91VB8        | Q91VB8_MOUSE       | Alpha globin 1                                            | Hba-a1 Glnc1, haemaglobin alpha 1,<br>haemaglobin alpha 2, Hba-a2 | Mus musculus        | 142        |
| P17182        | ENOA_MOUSE         | Alpha-enolase                                             | Eno1 Eno-1                                                        | Mus musculus        | 434        |

|               |                    |                                                                         |                             |                     |            |
|---------------|--------------------|-------------------------------------------------------------------------|-----------------------------|---------------------|------------|
| P46660        | AINX_MOUSE         | Alpha-internexin                                                        | Ina                         | Mus musculus        | 501        |
| Q02357        | ANK1_MOUSE         | Ankyrin-1                                                               | Ank1 Ank-1                  | Mus musculus        | 1862       |
| Q8C8R3        | ANK2_MOUSE         | Ankyrin-2                                                               | Ank2 AnkB                   | Mus musculus        | 3898       |
| G5E8K5        | ANK3_MOUSE         | Ankyrin-3                                                               | Ank3                        | Mus musculus        | 1961       |
| P48036        | ANXA5_MOUSE        | Annexin A5                                                              | Anxa5 Anx5                  | Mus musculus        | 319        |
| O35643        | AP1B1_MOUSE        | AP-1 complex subunit beta-1                                             | Ap1b1 Adtb1                 | Mus musculus        | 943        |
| Q7SIG6        | ASAP2_MOUSE        | Arf-GAP with SH3 domain, ANK repeat and PH domain-containing protein 2  | Asap2 Ddef2, Gm1523, Gm592  | Mus musculus        | 958        |
| P05202        | AATM_MOUSE         | Aspartate aminotransferase, mitochondrial                               | Got2 Got-2                  | Mus musculus        | 430        |
| Q9CQQ7        | AT5F1_MOUSE        | ATP synthase F(0) complex subunit B1, mitochondrial                     | Atp5pb Atp5f1               | Mus musculus        | 256        |
| Q78IK2        | ATPMK_MOUSE        | ATP synthase membrane subunit K, mitochondrial                          | Atp5mk Atp5md, Dapit, Usmg5 | Mus musculus        | 58         |
| P03930        | ATP8_MOUSE         | ATP synthase protein 8                                                  | Mtatp8 Atp8, mt-Atp8        | Mus musculus        | 67         |
| Q03265        | ATPA_MOUSE         | ATP synthase subunit alpha, mitochondrial                               | Atp5f1a Atp5a1              | Mus musculus        | 553        |
| P56480        | ATPB_MOUSE         | ATP synthase subunit beta, mitochondrial                                | Atp5f1b Atp5b               | Mus musculus        | 529        |
| Q9DCX2        | ATP5H_MOUSE        | ATP synthase subunit d, mitochondrial                                   | Atp5pd Atp5h                | Mus musculus        | 161        |
| Q9D3D9        | ATPD_MOUSE         | ATP synthase subunit delta, mitochondrial                               | Atp5f1d Atp5d               | Mus musculus        | 168        |
| P56135        | ATPK_MOUSE         | ATP synthase subunit f, mitochondrial                                   | Atp5mf Atp5j2               | Mus musculus        | 88         |
| <b>Q91VR2</b> | <b>ATPG_MOUSE</b>  | <b>ATP synthase subunit gamma, mitochondrial</b>                        | <b>Atp5f1c Atp5c1</b>       | <b>Mus musculus</b> | <b>298</b> |
| Q9DB20        | ATPO_MOUSE         | ATP synthase subunit O, mitochondrial                                   | Atp5po Atp5o, D12Wsu28e     | Mus musculus        | 213        |
| Q9ESV0        | DDX24_MOUSE        | ATP-dependent RNA helicase DDX24                                        | Ddx24                       | Mus musculus        | 857        |
| Q99PV8        | BC11B_MOUSE        | B-cell lymphoma/leukemia 11B                                            | Bcl11b Ctip2, Rit1          | Mus musculus        | 884        |
| P28663        | SNAB_MOUSE         | Beta-soluble NSF attachment protein (SNAP-beta)                         | Napb Snapb                  | Mus musculus        | 298        |
| <b>Q6WVG3</b> | <b>KCD12_MOUSE</b> | <b>BTB/POZ domain-containing protein KCTD12</b>                         | <b>Kctd12 Pfet1</b>         | <b>Mus musculus</b> | <b>327</b> |
| P12658        | CALB1_MOUSE        | Calbindin                                                               | Calb1                       | Mus musculus        | 261        |
| P11798        | KCC2A_MOUSE        | Calcium/calmodulin-dependent protein kinase type II subunit alpha       | Camk2a                      | Mus musculus        | 478        |
| <b>P28652</b> | <b>KCC2B_MOUSE</b> | <b>Calcium/calmodulin-dependent protein kinase type II subunit beta</b> | <b>Camk2b Camk2d</b>        | <b>Mus musculus</b> | <b>542</b> |
| Q6PHZ2        | KCC2D_MOUSE        | Calcium/calmodulin-dependent protein kinase type II subunit delta       | Camk2d Kiaa4163             | Mus musculus        | 499        |

|        |              |                                                        |                                   |              |      |
|--------|--------------|--------------------------------------------------------|-----------------------------------|--------------|------|
| Q08460 | KCMA1_MOUSE  | Calcium-activated potassium channel subunit alpha-1    | Kcnma1 Kcnma                      | Mus musculus | 1209 |
| Q8BH59 | CMC1_MOUSE   | Calcium-binding mitochondrial carrier protein Aralar1  | Slc25a12 Aralar1                  | Mus musculus | 677  |
| Q0VF55 | Q0VF55_MOUSE | Calcium-transporting ATPase                            | Atp2b3                            | Mus musculus | 1220 |
| Q6W3E0 | Q6W3E0_MOUSE | Calmodulin 5                                           | Calm5 Scarf2                      | Mus musculus | 140  |
| P0DP28 | CALM3_MOUSE  | Calmodulin-3                                           | Calm3 Cam3 Camc                   | Mus musculus | 149  |
| P35564 | CALX_MOUSE   | Calnexin                                               | Canx                              | Mus musculus | 591  |
| Q9JKC6 | CEND_MOUSE   | Cell cycle exit and neuronal differentiation protein 1 | Cend1 Bm88                        | Mus musculus | 149  |
| P60766 | CDC42_MOUSE  | Cell division control protein 42 homolog               | Cdc42                             | Mus musculus | 191  |
| Q6A078 | CE290_MOUSE  | Centrosomal protein of 290 kDa                         | Cep290 Kiaa0373 Nphp6             | Mus musculus | 2472 |
| Q68FD5 | CLH1_MOUSE   | Clathrin heavy chain 1                                 | Cltc                              | Mus musculus | 1675 |
| Q60771 | CLD11_MOUSE  | Claudin-11                                             | Cldn11 Osp Otm                    | Mus musculus | 207  |
| P45591 | COF2_MOUSE   | Cofilin-2                                              | Cfl2                              | Mus musculus | 166  |
| E9Q6B2 | CC85C_MOUSE  | Coiled-coil domain-containing protein 85C              | Ccdc85c                           | Mus musculus | 420  |
| Q9QZS0 | CO4A3_MOUSE  | Collagen alpha-3(IV) chain                             | Col4a3                            | Mus musculus | 1669 |
| Q02105 | C1QC_MOUSE   | Complement C1q subcomponent subunit C                  | C1qc C1qg                         | Mus musculus | 246  |
| P12960 | CNTN1_MOUSE  | Contactin-1                                            | Cntn1                             | Mus musculus | 1020 |
| O54991 | CNTP1_MOUSE  | Contactin-associated protein 1                         | Cntnap1 Nrnx4                     | Mus musculus | 1385 |
| Q1RLL3 | CPNE9_MOUSE  | Copine-9                                               | Cpne9                             | Mus musculus | 553  |
| Q04447 | KCRB_MOUSE   | Creatine kinase B-type                                 | Ckb Ckbb                          | Mus musculus | 381  |
| P30275 | KCRU_MOUSE   | Creatine kinase U-type, mitochondrial                  | Ckmt1                             | Mus musculus | 418  |
| P97315 | CSRP1_MOUSE  | Cysteine and glycine-rich protein 1                    | Csrp1 Crp1 Csrp                   | Mus musculus | 193  |
| Q9CZ13 | QCR1_MOUSE   | Cytochrome b-c1 complex subunit 1, mitochondrial       | Uqcrcl                            | Mus musculus | 480  |
| Q9DB77 | QCR2_MOUSE   | Cytochrome b-c1 complex subunit 2, mitochondrial       | Uqcrcl2                           | Mus musculus | 453  |
| Q62425 | NDUA4_MOUSE  | Cytochrome c oxidase subunit NDUA4                     | Ndufa4                            | Mus musculus | 82   |
| Q9D0M3 | CY1_MOUSE    | Cytochrome c1, heme protein, mitochondrial             | Cyc1                              | Mus musculus | 325  |
| Q9JHU4 | DYHC1_MOUSE  | Cytoplasmic dynein 1 heavy chain 1                     | Dync1h1 Dhcl, Dnch1, Dnchc1, Dyhc | Mus musculus | 4644 |
| Q5SQX6 | CYFP2_MOUSE  | Cytoplasmic FMR1-interacting protein 2                 | Cyfp2 Kiaa1168 Pir121             | Mus musculus | 1253 |

|               |                   |                                                                                           |                            |                     |            |
|---------------|-------------------|-------------------------------------------------------------------------------------------|----------------------------|---------------------|------------|
| Q8JZM4        | DNER_MOUSE        | Delta and Notch-like epidermal growth factor-related receptor                             | Dner Bet Bret              | Mus musculus        | 737        |
| Q6WQJ1        | DGLA_MOUSE        | Diacylglycerol lipase-alpha                                                               | Dagla Kiaa0659, Nsddr      | Mus musculus        | 1044       |
| O08749        | DLDH_MOUSE        | Dihydrolipoyl dehydrogenase, mitochondrial                                                | Dld                        | Mus musculus        | 509        |
| Q8BMF4        | ODP2_MOUSE        | Dihydrolipoyllysine-residue acetyltransferase component of pyruvate dehydrogenase complex | Dlat                       | Mus musculus        | 642        |
| O08553        | DPYL2_MOUSE       | Dihydropyrimidinase-related protein 2                                                     | Dpysl2 Crmp2 Ulip2         | Mus musculus        | 572        |
| P54103        | DNJC2_MOUSE       | DnaJ homolog subfamily C member 2                                                         | Dnajc2 Mida1, Zrf1         | Mus musculus        | 621        |
| P39053        | DYN1_MOUSE        | Dynamin-1                                                                                 | Dnm1 Dnm Kiaa4093          | Mus musculus        | 867        |
| P63168        | DYL1_MOUSE        | Dynein light chain 1, cytoplasmic                                                         | Dynll1 Dlc1, Dncl1, Dncl1  | Mus musculus        | 89         |
| Q61510        | TRI25_MOUSE       | E3 ubiquitin/ISG15 ligase TRIM25                                                          | Trim25 Efp, Zfp147, Znf147 | Mus musculus        | 634        |
| P23804        | MDM2_MOUSE        | E3 ubiquitin-protein ligase Mdm2                                                          | Mdm2                       | Mus musculus        | 489        |
| O88343        | S4A4_MOUSE        | Electrogenic sodium bicarbonate cotransporter 1                                           | Slc4a4 Nbc1, Nbce1         | Mus musculus        | 1079       |
| P10126        | EF1A1_MOUSE       | Elongation factor 1-alpha 1                                                               | Eef1a1 Eef1a               | Mus musculus        | 462        |
| P62631        | EF1A2_MOUSE       | Elongation factor 1-alpha 2                                                               | Eef1a2 Eef1al, Stn         | Mus musculus        | 463        |
| Q8BFR5        | EFTU_MOUSE        | Elongation factor Tu, mitochondrial                                                       | Tufm                       | Mus musculus        | 452        |
| P20029        | BIP_MOUSE         | Endoplasmic reticulum chaperone BiP                                                       | Hspa5 Grp78                | Mus musculus        | 655        |
| Q8BFZ9        | ERLN2_MOUSE       | Erlin-2                                                                                   | Erlin2 Spfh2               | Mus musculus        | 340        |
| Q61304        | Q61304_MOUSE      | Erythroid ankyrin (Fragment)                                                              | Ank1 Ank-1                 | Mus musculus        | 1098       |
| <b>P56564</b> | <b>EAA1_MOUSE</b> | <b>Excitatory amino acid transporter 1</b>                                                | <b>Slc1a3 Eaat1 Gmt1</b>   | <b>Mus musculus</b> | <b>543</b> |
| P43006        | EAA2_MOUSE        | Excitatory amino acid transporter 2                                                       | Slc1a2 Eaat2 Glt1          | Mus musculus        | 572        |
| <b>O35544</b> | <b>EAA4_MOUSE</b> | <b>Excitatory amino acid transporter 4</b>                                                | <b>Slc1a6 Eaat4</b>        | <b>Mus musculus</b> | <b>561</b> |
| P05063        | ALDOC_MOUSE       | Fructose-bisphosphate aldolase C                                                          | Aldoc Aldo3 Scrg2          | Mus musculus        | 363        |
| P97807        | FUMH_MOUSE        | Fumarate hydratase, mitochondrial                                                         | Fh Fh1                     | Mus musculus        | 507        |
| Q3UNH4        | GRIN1_MOUSE       | G protein-regulated inducer of neurite outgrowth 1                                        | Gprin1                     | Mus musculus        | 932        |
| P62812        | GBRA1_MOUSE       | Gamma-aminobutyric acid receptor subunit alpha-1                                          | Gabra1 Gabra-1             | Mus musculus        | 455        |
| P50571        | GBRB1_MOUSE       | Gamma-aminobutyric acid receptor subunit beta-1                                           | Gabrb1                     | Mus musculus        | 474        |
| P22723        | GBRG2_MOUSE       | Gamma-aminobutyric acid receptor subunit gamma-2                                          | Gabrg2                     | Mus musculus        | 474        |
| Q9WV18        | GABR1_MOUSE       | Gamma-aminobutyric acid type B receptor subunit 1                                         | Gabbr1                     | Mus musculus        | 960        |

|               |                    |                                                                         |                                      |                     |             |
|---------------|--------------------|-------------------------------------------------------------------------|--------------------------------------|---------------------|-------------|
| Q80T41        | GABR2_MOUSE        | Gamma-aminobutyric acid type B receptor subunit 2                       | Gabbr2 Gm425, Gpr51                  | Mus musculus        | 940         |
| Q61668        | Q61668_MOUSE       | Gene for histone H2a (Fragment)                                         |                                      | Mus musculus        | 37          |
| P26443        | DHE3_MOUSE         | Glutamate dehydrogenase 1, mitochondrial                                | Glud1 Glud                           | Mus musculus        | 558         |
| Q9Z2W9        | GRIA3_MOUSE        | Glutamate receptor 3                                                    | Gria3 Glur3, Kiaa4184                | Mus musculus        | 888         |
| <b>Q61625</b> | <b>GRID2_MOUSE</b> | <b>Glutamate receptor ionotropic, delta-2</b>                           | <b>Grid2</b>                         | <b>Mus musculus</b> | <b>1007</b> |
| P15105        | GLNA_MOUSE         | Glutamine synthetase                                                    | Glul Glns                            | Mus musculus        | 373         |
| P16858        | G3P_MOUSE          | Glyceraldehyde-3-phosphate dehydrogenase                                | Gapdh Gapd                           | Mus musculus        | 333         |
| Q921M4        | GOGA2_MOUSE        | Golgin subfamily A member 2                                             | Golga2                               | Mus musculus        | 999         |
| Q99JG2        | G37L1_MOUSE        | G-protein coupled receptor 37-like 1                                    | Gpr37l1 Etbrlp2                      | Mus musculus        | 481         |
| B2RSH2        | GNAI1_MOUSE        | Guanine nucleotide-binding protein G(i) subunit alpha-1                 | Gnai1 Gnai-1                         | Mus musculus        | 354         |
| P08752        | GNAI2_MOUSE        | Guanine nucleotide-binding protein G(i) subunit alpha-2                 | Gnai2 Gnai-2                         | Mus musculus        | 355         |
| P63213        | GBG2_MOUSE         | Guanine nucleotide-binding protein G(I)/G(S)/G(O) subunit gamma-2       | Gng2                                 | Mus musculus        | 71          |
| <b>P62874</b> | <b>GBB1_MOUSE</b>  | <b>Guanine nucleotide-binding protein G(I)/G(S)/G(T) subunit beta-1</b> | <b>Gnb1</b>                          | <b>Mus musculus</b> | <b>340</b>  |
| P62880        | GBB2_MOUSE         | Guanine nucleotide-binding protein G(I)/G(S)/G(T) subunit beta-2        | Gnb2                                 | Mus musculus        | 340         |
| <b>P18872</b> | <b>GNAO_MOUSE</b>  | <b>Guanine nucleotide-binding protein G(o) subunit alpha</b>            | <b>Gnao1 Gna0 Gnao</b>               | <b>Mus musculus</b> | <b>354</b>  |
| P21279        | GNAQ_MOUSE         | Guanine nucleotide-binding protein G(q) subunit alpha                   | Gnaq                                 | Mus musculus        | 359         |
| P21278        | GNA11_MOUSE        | Guanine nucleotide-binding protein subunit alpha-11                     | Gna11 Gna-11                         | Mus musculus        | 359         |
| P30677        | GNA14_MOUSE        | Guanine nucleotide-binding protein subunit alpha-14                     | Gna14 Gna-14                         | Mus musculus        | 355         |
| P63017        | HSP7C_MOUSE        | Heat shock cognate 71 kDa protein                                       | Hspa8 Hsc70, Hsc73                   | Mus musculus        | 646         |
| P11499        | HS90B_MOUSE        | Heat shock protein HSP 90-beta                                          | Hsp90ab1 Hsp84 Hsp84-1 Hspcb         | Mus musculus        | 724         |
| P02088        | HBB1_MOUSE         | Hemoglobin subunit beta-1                                               | Hbb-b1                               | Mus musculus        | 147         |
| Q640R3        | HECAM_MOUSE        | Hepatocyte cell adhesion molecule                                       | Hepacam                              | Mus musculus        | 418         |
| A0AUV1        | A0AUV1_MOUSE       | Histone H2A (Fragment)                                                  | H2ac12 Hist1h2ah                     | Mus musculus        | 127         |
| P70696        | H2B1A_MOUSE        | Histone H2B type 1-A                                                    | H2bc1 Hist1h2ba, Th2b                | Mus musculus        | 127         |
| A1L0U3        | A1L0U3_MOUSE       | Histone H3 (Fragment)                                                   | Hist1h3e                             | Mus musculus        | 133         |
| P84244        | H33_MOUSE          | Histone H3.3                                                            | H3-3a H3.3a H3f3a; H3-3b H3.3b H3f3b | Mus musculus        | 136         |

|        |             |                                                             |                                                                                                                                                                                                                        |                     |             |
|--------|-------------|-------------------------------------------------------------|------------------------------------------------------------------------------------------------------------------------------------------------------------------------------------------------------------------------|---------------------|-------------|
| P62806 | H4_MOUSE    | Histone H4                                                  | H4c1 Hist1h4a, others                                                                                                                                                                                                  | Mus musculus        | 103         |
| P62806 | H4_MOUSE    | Histone H4                                                  | H4c1 Hist1h4a; H4c2 H4-53<br>Hist1h4b; H4c3 H4-12 Hist1h4c;<br>H4c4 Hist1h4d; H4c6 Hist1h4f;<br>H4c8 Hist1h4h; H4c9 Hist1h4i;<br>H4c11 Hist1h4j; H4c12 Hist1h4k;<br>Hist1h4m; H4c14 Hist2h4 Hist2h4a;<br>H4f16 Hist4h4 | Mus musculus        | 103         |
| Q9Z2Y3 | HOME1_MOUSE | Homer protein homolog 1 (Homer-1)                           | Homer1 Vesl1                                                                                                                                                                                                           | Mus musculus        | 366         |
| Q99JP6 | HOME3_MOUSE | <b>Homer protein homolog 3 (Homer-3)</b>                    | <b>Homer3</b>                                                                                                                                                                                                          | <b>Mus musculus</b> | <b>356</b>  |
| P11881 | ITPR1_MOUSE | <b>Inositol 1,4,5-trisphosphate receptor type 1</b>         | <b>Itp1r Insp3r Pcd6 Pcp1</b>                                                                                                                                                                                          | <b>Mus musculus</b> | <b>2749</b> |
| Q7TNC9 | I5P1_MOUSE  | <b>Inositol polyphosphate-5-phosphatase A</b>               | <b>Inpp5a</b>                                                                                                                                                                                                          | <b>Mus musculus</b> | <b>412</b>  |
| Q8R4K2 | IRAK4_MOUSE | Interleukin-1 receptor-associated kinase 4                  | Irak4                                                                                                                                                                                                                  | Mus musculus        | 459         |
| Q9D6R2 | IDH3A_MOUSE | Isocitrate dehydrogenase [NAD] subunit alpha, mitochondrial | Idh3a                                                                                                                                                                                                                  | Mus musculus        | 366         |
| Q9JJ57 | KCIP1_MOUSE | Kv channel-interacting protein 1                            | Kcnip1 Kchip1                                                                                                                                                                                                          | Mus musculus        | 227         |
| Q6PHZ8 | KCIP4_MOUSE | Kv channel-interacting protein 4                            | Kcnip4 Calp Kchip4                                                                                                                                                                                                     | Mus musculus        | 250         |
| Q8BLK3 | LSAMP_MOUSE | Limbic system-associated membrane protein                   | Lsamp                                                                                                                                                                                                                  | Mus musculus        | 34          |
| Q9ESE1 | LRBA_MOUSE  | Lipopolysaccharide-responsive and beige-like anchor protein | Lrba Bgl, Lba                                                                                                                                                                                                          | Mus musculus        | 2856        |
| P16125 | LDHB_MOUSE  | L-lactate dehydrogenase B chain                             | Ldhb Ldh-2, Ldh2                                                                                                                                                                                                       | Mus musculus        | 334         |
| P14152 | MDHC_MOUSE  | Malate dehydrogenase, cytoplasmic                           | Mdh1 Mor2                                                                                                                                                                                                              | Mus musculus        | 334         |
| P08249 | MDHM_MOUSE  | Malate dehydrogenase, mitochondrial                         | Mdh2 Mor1                                                                                                                                                                                                              | Mus musculus        | 338         |
| A2AG50 | MA7D2_MOUSE | MAP7 domain-containing protein 2                            | Map7d2 Mtap7d2                                                                                                                                                                                                         | Mus musculus        | 781         |
| P97772 | GRM1_MOUSE  | <b>Metabotropic glutamate receptor 1</b>                    | <b>Grm1 Gprc1a Mglur1</b>                                                                                                                                                                                              | <b>Mus musculus</b> | <b>1199</b> |
| Q3UVX5 | GRM5_MOUSE  | Metabotropic glutamate receptor 5                           | Grm5 Gprc1e, Mglur5                                                                                                                                                                                                    | Mus musculus        | 1203        |
| Q9QYR6 | MAP1A_MOUSE | Microtubule-associated protein 1A (MAP-1A)                  | Map1a Mtap1 Mtap1a                                                                                                                                                                                                     | Mus musculus        | 2776        |
| P27546 | MAP4_MOUSE  | Microtubule-associated protein 4 (MAP-4)                    | Map4 Mtap4                                                                                                                                                                                                             | Mus musculus        | 1125        |
| Q7TSJ2 | MAP6_MOUSE  | Microtubule-associated protein 6 (MAP-6)                    | Map6 Mtap6                                                                                                                                                                                                             | Mus musculus        | 906         |
| Q9CR62 | M2OM_MOUSE  | Mitochondrial 2-oxoglutarate/malate carrier protein         | Slc25a11                                                                                                                                                                                                               | Mus musculus        | 314         |
| P53986 | MOT1_MOUSE  | Monocarboxylate transporter 1                               | Slc16a1 Mct1                                                                                                                                                                                                           | Mus musculus        | 493         |

|               |                    |                                                              |                          |                     |            |
|---------------|--------------------|--------------------------------------------------------------|--------------------------|---------------------|------------|
| A6H6E2        | MMRN2_MOUSE        | Multimerin-2                                                 | Mmrn2                    | Mus musculus        | 943        |
| P04370        | MBP_MOUSE          | Myelin basic protein                                         | Mbp Shi                  | Mus musculus        | 250        |
| P60202        | MYPR_MOUSE         | Myelin proteolipid protein                                   | Plp1 Plp                 | Mus musculus        | 277        |
| Q61885        | MOG_MOUSE          | Myelin-oligodendrocyte glycoprotein                          | Mog                      | Mus musculus        | 246        |
| O35682        | MYADM_MOUSE        | Myeloid-associated differentiation marker                    | Myadm Mug                | Mus musculus        | 320        |
| P26645        | MARCS_MOUSE        | Myristoylated alanine-rich C-kinase substrate                | Marcks Macs              | Mus musculus        | 309        |
| Q91VD9        | NDUS1_MOUSE        | NADH-ubiquinone oxidoreductase 75 kDa subunit, mitochondrial | Ndufs1                   | Mus musculus        | 727        |
| P13595        | NCAM1_MOUSE        | Neural cell adhesion molecule 1                              | Ncam1 Ncam               | Mus musculus        | 1115       |
| Q64322        | NPDC1_MOUSE        | Neural proliferation differentiation and control protein 1   | Npdc1 Npdc-1             | Mus musculus        | 332        |
| Q9EPN1        | NBEA_MOUSE         | Neurobeachin                                                 | Nbea Lyst2               | Mus musculus        | 2936       |
| P19246        | NFH_MOUSE          | Neurofilament heavy polypeptide                              | Nefh Kiaa0845, Nfh       | Mus musculus        | 1090       |
| P08551        | NFL_MOUSE          | Neurofilament light polypeptide                              | Nefl Nf68, Nfl           | Mus musculus        | 543        |
| P08553        | NFM_MOUSE          | Neurofilament medium polypeptide                             | Nefm Nef3 Nfm            | Mus musculus        | 848        |
| Q99K10        | NLGN1_MOUSE        | Neuroigin-1                                                  | Nlgn1 Kiaa1070           | Mus musculus        | 843        |
| Q69ZK9        | NLGN2_MOUSE        | Neuroigin-2                                                  | Nlgn2 Kiaa1366           | Mus musculus        | 836        |
| P06837        | NEUM_MOUSE         | Neuromodulin (Axonal membrane protein GAP-43)                | Gap43 Basp2              | Mus musculus        | 227        |
| <b>P35802</b> | <b>GPM6A_MOUSE</b> | <b>Neuronal membrane glycoprotein M6-a</b>                   | <b>Gpm6a M6a</b>         | <b>Mus musculus</b> | <b>278</b> |
| Q9Z1S5        | SEPT3_MOUSE        | Neuronal-specific septin-3                                   | Septin3 Sep3 Sept3       | Mus musculus        | 350        |
| P84075        | HPCA_MOUSE         | Neuron-specific calcium-binding protein hippocalcin          | Hpca                     | Mus musculus        | 193        |
| P97300        | NPTN_MOUSE         | Neuroplastin                                                 | Nptn Sdfr1 Sdr1          | Mus musculus        | 397        |
| Q9Z0J4        | NOS1_MOUSE         | Nitric oxide synthase, brain                                 | Nos1                     | Mus musculus        | 1429       |
| P70353        | NFYC_MOUSE         | Nuclear transcription factor Y subunit gamma                 | Nfyc                     | Mus musculus        | 335        |
| B2RXT3        | B2RXT3_MOUSE       | Oxoglutarate dehydrogenase                                   | Ogdhl                    | Mus musculus        | 1010       |
| Q9D7Y7        | Q9D7Y7_MOUSE       | Peptidase S1 domain-containing protein                       | 2210010C04Rik            | Mus musculus        | 247        |
| P99029        | PRDX5_MOUSE        | Peroxiredoxin-5, mitochondrial                               | Prdx5 Prdx6              | Mus musculus        | 210        |
| <b>Q8VEM8</b> | <b>MPCP_MOUSE</b>  | <b>Phosphate carrier protein, mitochondrial</b>              | <b>Slc25a3</b>           | <b>Mus musculus</b> | <b>357</b> |
| Q99L43        | CDS2_MOUSE         | Phosphatidate cytidylyltransferase 2                         | Cds2                     | Mus musculus        | 444        |
| Q9ES52        | SHIP1_MOUSE        | Phosphatidylinositol 3,4,5-trisphosphate 5-phosphatase 1     | Inpp5d 7a33, Ship, Ship1 | Mus musculus        | 1191       |

|               |                   |                                                                                |                                               |                     |            |
|---------------|-------------------|--------------------------------------------------------------------------------|-----------------------------------------------|---------------------|------------|
| E9Q3L2        | PI4KA_MOUSE       | Phosphatidylinositol 4-kinase alpha                                            | Pi4ka Pik4 Pik4ca                             | Mus musculus        | 2105       |
| Q3T9Y0        | Q3T9Y0_MOUSE      | Phosphatidylinositol-4,5-bisphosphate 3-kinase                                 | Pik3cd                                        | Mus musculus        | 1047       |
| Q7TME0        | PLPR4_MOUSE       | Phospholipid phosphatase-related protein type 4                                | Plppr4 D3Bwg0562e Kiaa0455<br>Lppr4 Php1 Prg1 | Mus musculus        | 766        |
| Q68FH0        | PKP4_MOUSE        | Plakophilin-4                                                                  | Pkp4 Armrp                                    | Mus musculus        | 1190       |
| G5E829        | AT2B1_MOUSE       | Plasma membrane calcium-transporting ATPase 1                                  | Atp2b1                                        | Mus musculus        | 1220       |
| Q9R0K7        | AT2B2_MOUSE       | Plasma membrane calcium-transporting ATPase 2                                  | Atp2b2 Pmca2                                  | Mus musculus        | 1198       |
| Q9CY58        | PAIRB_MOUSE       | Plasminogen activator inhibitor 1 RNA-binding protein                          | Serbp1 Pairbp1                                | Mus musculus        | 407        |
| P0CG50        | UBC_MOUSE         | Polyubiquitin-C                                                                | Ubc                                           | Mus musculus        | 734        |
| Q63959        | KCNC3_MOUSE       | Potassium voltage-gated channel subfamily C member 3                           | Kcnc3                                         | Mus musculus        | 769        |
| Q9Z0V2        | KCND2_MOUSE       | Potassium voltage-gated channel subfamily D member 2                           | Kcnd2 Kiaa1044 MNCb-7013                      | Mus musculus        | 630        |
| Q9Z0V1        | KCND3_MOUSE       | Potassium voltage-gated channel subfamily D member 3                           | Kcnd3                                         | Mus musculus        | 655        |
| O88704        | HCN1_MOUSE        | Potassium/sodium hyperpolarization-activated cyclic nucleotide-gated channel 1 | Hcn1 Bcng1 Hac2                               | Mus musculus        | 910        |
| P67778        | PHB1_MOUSE        | Prohibitin 1                                                                   | Phb1 Phb                                      | Mus musculus        | 272        |
| O35129        | PHB2_MOUSE        | Prohibitin-2                                                                   | Phb2 Bap, Bcap37, Rea                         | Mus musculus        | 299        |
| O35449        | PRRT1_MOUSE       | Proline-rich transmembrane protein 1                                           | Prrt1 Ng5                                     | Mus musculus        | 306        |
| Q9Z1R9        | Q9Z1R9_MOUSE      | Protease, serine 1 (trypsin 1)                                                 | Prss1 Trygn16, trypsinogen                    | Mus musculus        | 246        |
| Q8BQN5        | FA78B_MOUSE       | Protein FAM78B                                                                 | Fam78b                                        | Mus musculus        | 261        |
| Q61644        | PACN1_MOUSE       | Protein kinase C and casein kinase substrate in neurons protein 1              | Pacsin1 Pacsin                                | Mus musculus        | 441        |
| <b>P63318</b> | <b>KPCG_MOUSE</b> | <b>Protein kinase C gamma type</b>                                             | <b>Prkcg Pkcc, Pkcg, Prkcc</b>                | <b>Mus musculus</b> | <b>697</b> |
| O55125        | NIP51_MOUSE       | Protein NipSnap homolog 1                                                      | Nipsnap1                                      | Mus musculus        | 284        |
| Q3UH99        | SHSA6_MOUSE       | Protein shisa-6                                                                | Shisa6 Gm879                                  | Mus musculus        | 525        |
| Q3UUD2        | SPRY3_MOUSE       | Protein sprouty homolog 3 (Spry-3)                                             | Spry3                                         | Mus musculus        | 288        |
| Q80WQ2        | VAC14_MOUSE       | Protein VAC14 homolog                                                          | Vac14 D8Wsu151e                               | Mus musculus        | 782        |
| P23506        | PIMT_MOUSE        | Protein-L-isoaspartate(D-aspartate) O-methyltransferase (PIMT)                 | Pcmt1                                         | Mus musculus        | 227        |
| F8VPK8        | F8VPK8_MOUSE      | Protocadherin 9                                                                | Pcdh9                                         | Mus musculus        | 1237       |
| Q91XX1        | Q91XX1_MOUSE      | Protocadherin gamma C3                                                         | Pcdhgc3                                       | Mus musculus        | 934        |
| Q68FL4        | SAHH3_MOUSE       | Putative adenosylhomocysteinase 3                                              | Ahcyl2                                        | Mus musculus        | 613        |



|               |                    |                                                                                   |                                              |                     |            |
|---------------|--------------------|-----------------------------------------------------------------------------------|----------------------------------------------|---------------------|------------|
| P35486        | ODPA_MOUSE         | Pyruvate dehydrogenase E1 component subunit alpha, somatic form, mitochondrial    | Pdha1 Pdha-1                                 | Mus musculus        | 390        |
| P52480        | KPYM_MOUSE         | Pyruvate kinase PKM                                                               | Pkm Pk3 Pkm2 Pykm                            | Mus musculus        | 531        |
| P60764        | RAC3_MOUSE         | Ras-related C3 botulinum toxin substrate 3                                        | Rac3                                         | Mus musculus        | 192        |
| Q99JI6        | RAP1B_MOUSE        | Ras-related protein Rap-1b                                                        | Rap1b                                        | Mus musculus        | 184        |
| O54829        | RGS7_MOUSE         | Regulator of G-protein signaling 7                                                | Rgs7                                         | Mus musculus        | 469        |
| Q7M6X3        | Q7M6X3_MOUSE       | Regulator of sex-limitation candidate 8                                           | Zfp759 BC028265, Rslcan8                     | Mus musculus        | 721        |
| Q6ZQ82        | RHG26_MOUSE        | Rho GTPase-activating protein 26                                                  | Arhgap26 Kiaa0621                            | Mus musculus        | 814        |
| <b>Q8BW86</b> | <b>ARG33_MOUSE</b> | <b>Rho guanine nucleotide exchange factor 33</b>                                  | <b>Arhgef33 Gm941</b>                        | <b>Mus musculus</b> | <b>850</b> |
| Q80SW1        | SAHH2_MOUSE        | S-adenosylhomocysteine hydrolase-like protein 1                                   | Ahcyl1 Irbit                                 | Mus musculus        | 530        |
| Q64518        | AT2A3_MOUSE        | Sarcoplasmic/endoplasmic reticulum calcium ATPase 3                               | Atp2a3                                       | Mus musculus        | 999        |
| Q9Z0I6        | Q9Z0I6_MOUSE       | Schlafen 2                                                                        | Slfn2 OTTMUSCASC00059410, OTTMUSPWKG00059397 | Mus musculus        | 378        |
| Q9QUR8        | SEM7A_MOUSE        | Semaphorin-7A                                                                     | Sema7a Cd108 Semal Semk1                     | Mus musculus        | 664        |
| E9Q1G8        | E9Q1G8_MOUSE       | Septin                                                                            | Septin7 Sept7                                | Mus musculus        | 437        |
| Q8C1B7        | SEP11_MOUSE        | Septin-11                                                                         | Septin11 D5Ert606e Sept11                    | Mus musculus        | 431        |
| P28661        | SEPT4_MOUSE        | Septin-4                                                                          | Septin4 Bh5 Gm11492 Pnutl2 Sep4 Sept4        | Mus musculus        | 478        |
| Q9Z2Q6        | SEPT5_MOUSE        | Septin-5                                                                          | Septin5 Pnutl1, Sept5                        | Mus musculus        | 369        |
| Q9R1T4        | SEPT6_MOUSE        | Septin-6                                                                          | Septin6 Kiaa0128 Sept6                       | Mus musculus        | 434        |
| O55131        | SEPT7_MOUSE        | Septin-7                                                                          | Septin7 Cdc10, Sept7                         | Mus musculus        | 436        |
| Q6P1F6        | 2ABA_MOUSE         | Serine/threonine-protein phosphatase 2A 55 kDa regulatory subunit B alpha isoform | Ppp2r2a                                      | Mus musculus        | 447        |
| P63328        | PP2BA_MOUSE        | Serine/threonine-protein phosphatase 2B catalytic subunit alpha isoform           | Ppp3ca Calna                                 | Mus musculus        | 521        |
| P48453        | PP2BB_MOUSE        | Serine/threonine-protein phosphatase 2B catalytic subunit beta isoform            | Ppp3cb Calnb                                 | Mus musculus        | 525        |
| P48455        | PP2BC_MOUSE        | Serine/threonine-protein phosphatase 2B catalytic subunit gamma isoform           | Ppp3cc Calnc                                 | Mus musculus        | 513        |
| P63087        | PP1G_MOUSE         | Serine/threonine-protein phosphatase PP1-gamma catalytic subunit                  | Ppp1cc                                       | Mus musculus        | 323        |
| D3YZU1        | SHAN1_MOUSE        | SH3 and multiple ankyrin repeat domains protein 1 (Shank1)                        | Shank1                                       | Mus musculus        | 2167       |

|        |              |                                                                          |                                     |                     |             |
|--------|--------------|--------------------------------------------------------------------------|-------------------------------------|---------------------|-------------|
| Q80Z38 | SHAN2_MOUSE  | SH3 and multiple ankyrin repeat domains protein 2 (Shank2)               | Shank2 Cortbp1 Kiaa1022             | Mus musculus        | 1476        |
| B1ATV3 | B1ATV3_MOUSE | Short transient receptor potential channel 3                             | Trpc3 CT7-314H19.1-001              | Mus musculus        | 910         |
| Q61143 | TRPC6_MOUSE  | Short transient receptor potential channel 6                             | Trpc6 Trp6, Trrp6                   | Mus musculus        | 930         |
| Q91V61 | SFXN3_MOUSE  | Sideroflexin-3                                                           | Sfxn3                               | Mus musculus        | 321         |
| Q925N0 | SFXN5_MOUSE  | Sideroflexin-5                                                           | Sfxn5                               | Mus musculus        | 342         |
| Q14BI1 | Q14BI1_MOUSE | Slc24a2 protein                                                          | Slc24a2                             | Mus musculus        | 711         |
| P31648 | SC6A1_MOUSE  | Sodium- and chloride-dependent GABA transporter 1                        | Slc6a1 Gabt1, Gat-1, Gat1           | Mus musculus        | 599         |
| P31650 | S6A11_MOUSE  | Sodium- and chloride-dependent GABA transporter 3 (GAT-3)                | Slc6a11 Gabt3 Gabt4 Gat-4 Gat3 Gat4 | Mus musculus        | 627         |
| Q62467 | Q62467_MOUSE | Sodium channel protein                                                   | Scn7a                               | Mus musculus        | 1681        |
| P70414 | NAC1_MOUSE   | Sodium/calcium exchanger 1                                               | Slc8a1 Ncx                          | Mus musculus        | 970         |
| Q8K596 | NAC2_MOUSE   | Sodium/calcium exchanger 2                                               | Slc8a2 Ncx2                         | Mus musculus        | 921         |
| Q8VDN2 | AT1A1_MOUSE  | Sodium/potassium-transporting ATPase subunit alpha-1                     | Atp1a1                              | Mus musculus        | 1023        |
| Q6PIE5 | AT1A2_MOUSE  | <b>Sodium/potassium-transporting ATPase subunit alpha-2</b>              | <b>Atp1a2</b>                       | <b>Mus musculus</b> | <b>1020</b> |
| Q6PIC6 | AT1A3_MOUSE  | <b>Sodium/potassium-transporting ATPase subunit alpha-3</b>              | <b>Atp1a3</b>                       | <b>Mus musculus</b> | <b>1013</b> |
| P14094 | AT1B1_MOUSE  | <b>Sodium/potassium-transporting ATPase subunit beta-1</b>               | <b>Atp1b1 Atp4b</b>                 | <b>Mus musculus</b> | <b>304</b>  |
| P14231 | AT1B2_MOUSE  | Sodium/potassium-transporting ATPase subunit beta-2                      | Atp1b2                              | Mus musculus        | 290         |
| Q61609 | S20A1_MOUSE  | Sodium-dependent phosphate transporter 1                                 | Slc20a1 Glvr1 Pit1                  | Mus musculus        | 681         |
| Q5DTL9 | S4A10_MOUSE  | Sodium-driven chloride bicarbonate exchanger                             | Slc4a10 Kiaa4136 Ncbe               | Mus musculus        | 1118        |
| P55012 | S12A2_MOUSE  | Solute carrier family 12 member 2                                        | Slc12a2 Nkcc1                       | Mus musculus        | 1205        |
| Q91V14 | S12A5_MOUSE  | <b>Solute carrier family 12 member 5</b>                                 | <b>Slc12a5 Kcc2 Kiaa1176</b>        | <b>Mus musculus</b> | <b>1138</b> |
| P16546 | SPTN1_MOUSE  | Spectrin alpha chain, non-erythrocytic 1                                 | Sptan1 Spna2, Spta2                 | Mus musculus        | 2472        |
| Q68FG2 | Q68FG2_MOUSE | Spectrin beta chain                                                      | Sptbn2 Spnb3                        | Mus musculus        | 2388        |
| Q62261 | SPTB2_MOUSE  | Spectrin beta chain, non-erythrocytic                                    | Sptbn1 Elf, Spnb-2, Spnb2, Sptb2    | Mus musculus        | 2363        |
| P38647 | GRP75_MOUSE  | Stress-70 protein, mitochondrial (75 kDa glucose-regulated protein)      | Hspa9 Grp75 Hsp74 Hspa9a            | Mus musculus        | 679         |
| Q8K2B3 | SDHA_MOUSE   | Succinate dehydrogenase [ubiquinone] flavoprotein subunit, mitochondrial | Sdha                                | Mus musculus        | 664         |
| Q9WUM5 | SUCA_MOUSE   | Succinate--CoA ligase [ADP/GDP-forming] subunit alpha, mitochondrial     | Suc1g1                              | Mus musculus        | 346         |

|               |                   |                                                 |                            |                     |            |
|---------------|-------------------|-------------------------------------------------|----------------------------|---------------------|------------|
| A2ANU3        | SYNG1_MOUSE       | Synapse differentiation-inducing gene protein 1 | Syndig1 Tmem90b            | Mus musculus        | 258        |
| O88935        | SYN1_MOUSE        | Synapsin-1                                      | Syn1 Syn-1                 | Mus musculus        | 706        |
| Q9JIS5        | SV2A_MOUSE        | Synaptic vesicle glycoprotein 2A                | Sv2a Kiaa0736 Sv2          | Mus musculus        | 742        |
| P60879        | SNP25_MOUSE       | Synaptosomal-associated protein 25              | Snap25 Snap                | Mus musculus        | 206        |
| P46096        | SYT1_MOUSE        | Synaptotagmin-1                                 | Syt1                       | Mus musculus        | 421        |
| <b>P46097</b> | <b>SYT2_MOUSE</b> | <b>Synaptotagmin-2</b>                          | <b>Syt2</b>                | <b>Mus musculus</b> | <b>422</b> |
| Q99N50        | SYTL2_MOUSE       | Synaptotagmin-like protein 2                    | Sytl2 Slp2                 | Mus musculus        | 950        |
| Q8BVI5        | STX16_MOUSE       | Syntaxin-16                                     | Stx16                      | Mus musculus        | 326        |
| P61264        | STX1B_MOUSE       | Syntaxin-1B                                     | Stx1b Stx1b1 Stx1b2        | Mus musculus        | 288        |
| O08599        | STXB1_MOUSE       | Syntaxin-binding protein 1                      | Stxbp1                     | Mus musculus        | 594        |
| Q9Z1A9        | TBCD8_MOUSE       | TBC1 domain family member 8                     | Tbc1d8 Hblp1 Vrp           | Mus musculus        | 1134       |
| P01831        | THY1_MOUSE        | Thy-1 membrane glycoprotein                     | Thy1 Thy-1                 | Mus musculus        | 162        |
| Q9QUI0        | RHOA_MOUSE        | Transforming protein RhoA                       | Rhoa Arha, Arha2           | Mus musculus        | 193        |
| Q01853        | TERA_MOUSE        | Transitional endoplasmic reticulum ATPase       | Vcp                        | Mus musculus        | 806        |
| Q9CQG6        | TM147_MOUSE       | Transmembrane protein 147                       | Tmem147                    | Mus musculus        | 224        |
| P17751        | TPIS_MOUSE        | Triosephosphate isomerase                       | Tpi1                       | Mus musculus        | 249        |
| Q8BNV1        | TRM2A_MOUSE       | tRNA (uracil-5-)-methyltransferase homolog A    | Trmt2a Htf9-c Htf9c        | Mus musculus        | 574        |
| P68369        | TBA1A_MOUSE       | Tubulin alpha-1A chain                          | Tuba1a Tuba1               | Mus musculus        | 451        |
| P68373        | TBA1C_MOUSE       | Tubulin alpha-1C chain                          | Tuba1c Tuba6               | Mus musculus        | 449        |
| P05214        | TBA3_MOUSE        | Tubulin alpha-3 chain                           | Tuba3a Tuba3; Tuba3b Tuba7 | Mus musculus        | 450        |
| P68368        | TBA4A_MOUSE       | Tubulin alpha-4A chain                          | Tuba4a Tuba4               | Mus musculus        | 448        |
| Q9CVR0        | Q9CVR0_MOUSE      | Tubulin beta chain (Fragment)                   | Tubb4b Tubb2c Tubb2c1      | Mus musculus        | 291        |
| Q9CWF2        | TBB2B_MOUSE       | Tubulin beta-2B chain                           | Tubb2b                     | Mus musculus        | 445        |
| Q9ERD7        | TBB3_MOUSE        | Tubulin beta-3 chain                            | Tubb3                      | Mus musculus        | 450        |
| Q9D6F9        | TBB4A_MOUSE       | Tubulin beta-4A chain                           | Tubb4a Tubb4               | Mus musculus        | 444        |
| P68372        | TBB4B_MOUSE       | Tubulin beta-4B chain                           | Tubb4b Tubb2c              | Mus musculus        | 445        |
| P99024        | TBB5_MOUSE        | Tubulin beta-5 chain                            | Tubb5                      | Mus musculus        | 444        |
| Q922F4        | TBB6_MOUSE        | Tubulin beta-6 chain                            | Tubb6                      | Mus musculus        | 447        |

|        |              |                                                              |                                                |              |      |
|--------|--------------|--------------------------------------------------------------|------------------------------------------------|--------------|------|
| Q8CIV8 | TBCE_MOUSE   | Tubulin-specific chaperone E                                 | Tbce                                           | Mus musculus | 524  |
| P63024 | VAMP3_MOUSE  | Vesicle-associated membrane protein 3 (VAMP-3)               | Vamp3 Syb3                                     | Mus musculus | 103  |
| P46460 | NSF_MOUSE    | Vesicle-fusing ATPase                                        | Nsf Skd2                                       | Mus musculus | 744  |
| O08547 | SC22B_MOUSE  | Vesicle-trafficking protein SEC22b                           | Sec22b Sec22l1                                 | Mus musculus | 215  |
| P62761 | VISL1_MOUSE  | Visinin-like protein 1                                       | Vsnl1 Visl1                                    | Mus musculus | 191  |
| Q60932 | VDAC1_MOUSE  | Voltage-dependent anion-selective channel protein 1 (VDAC-1) | Vdac1 Vdac5                                    | Mus musculus | 296  |
| Q60930 | VDAC2_MOUSE  | Voltage-dependent anion-selective channel protein 2 (VDAC-2) | Vdac2 Vdac6                                    | Mus musculus | 295  |
| P62956 | CCG7_MOUSE   | Voltage-dependent calcium channel gamma-7 subunit            | Cacng7                                         | Mus musculus | 275  |
| Q6PHS9 | CA2D2_MOUSE  | Voltage-dependent calcium channel subunit alpha-2/delta-2    | Cacna2d2 Kiaa0558                              | Mus musculus | 1154 |
| Q8R054 | CACB4_MOUSE  | Voltage-dependent L-type calcium channel subunit beta-4      | Cacnb4 Cacnlb4                                 | Mus musculus | 519  |
| P97445 | CAC1A_MOUSE  | Voltage-dependent P/Q-type calcium channel subunit alpha-1A  | Cacna1a Caca1a, Cach4, Cacn3, Cacnl1a4, Ccha1a | Mus musculus | 2368 |
| Q5SUG4 | Q5SUG4_MOUSE | Voltage-dependent T-type calcium channel subunit alpha       | Cacna1g                                        | Mus musculus | 2295 |
| O88427 | CAC1H_MOUSE  | Voltage-dependent T-type calcium channel subunit alpha-1H    | Cacna1h Kiaa1120                               | Mus musculus | 2365 |
| P62482 | KCAB2_MOUSE  | Voltage-gated potassium channel subunit beta-2               | Kcnab2 Ckbeta2, I2rf5, Kcnb3                   | Mus musculus | 367  |
| Q9Z1G4 | VPP1_MOUSE   | V-type proton ATPase 116 kDa subunit a 1                     | Atp6v0a1 Atp6n1                                | Mus musculus | 839  |
| P50516 | VATA_MOUSE   | V-type proton ATPase catalytic subunit A                     | Atp6v1a Atp6a1 Atp6a2 Atp6v1a1                 | Mus musculus | 617  |
| P62814 | VATB2_MOUSE  | V-type proton ATPase subunit B, brain isoform                | Atp6v1b2 Atp6b2, Vat2                          | Mus musculus | 511  |
| P51863 | VA0D1_MOUSE  | V-type proton ATPase subunit d 1                             | Atp6v0d1 Atp6d                                 | Mus musculus | 351  |
