# Supplementary material for: Protein Networks Associated with Native Metabotropic Glutamate 1 Receptors (mGlu1) in the Mouse Cerebellum
Source: MDPI journal article supplement (doi:10.3390/cells12091325), 2023-05-05
Supplement: s1 [file s1]

**Table S1: mGlu<sub>1</sub> peptides identified by LC-MS/MS in six immunoprecipitation replicate experiments.**

mGlu<sub>1</sub> $\alpha$ -specific peptides are indicated in bold and light green cells. mGlu<sub>1</sub> $\beta$ -specific peptides are indicated in italics and in light blue cells. The other peptides do not discriminate between the two isoforms

| Peptide                                         | Exp 1 | Exp 2 | Exp 3 | Exp 4 | Exp 5 | Exp 6 |
|-------------------------------------------------|-------|-------|-------|-------|-------|-------|
| ACDLGWWPNAELTGCEPITIR                           | X     | X     | X     | X     | X     |       |
| AMLDIVKR                                        |       | X     | X     | X     |       |       |
| CLPDGQTLPPGR                                    | X     | X     | X     | X     | X     | X     |
| DEVIEGYEVEANGGITIK                              |       |       | X     |       |       | X     |
| DSCWHSSVALEQSIEFIR                              | X     |       | X     | X     | X     |       |
| DSLISIRDEK                                      | X     | X     |       | X     | X     | X     |
| DSLISIRDEKDGILNR                                | X     | X     |       |       |       |       |
| DSVASGSSVPSSPVSESVLCTPPNVYASVILR                |       |       | X     | X     | X     |       |
| EEPISPPGEDDDDDSSER                              | X     | X     | X     | X     | X     | X     |
| EGNTEEDDLEEEEDLPAASK                            | X     | X     | X     | X     | X     | X     |
| ELAAQEGLCIAHSDKIYSNAGEK                         |       |       |       |       | X     |       |
| ELAAQEGLCIAHSDK                                 | X     | X     | X     | X     | X     | X     |
| ENEFVQDEFTCR                                    | X     | X     | X     | X     | X     | X     |
| GDAPGRYDIMNLQYTEANR                             |       |       |       |       | X     |       |
| GEVSCCWICTACK                                   |       |       | X     | X     | X     |       |
| GLPPPLPQQQQPPPPQPPQPK                           | X     | X     | X     | X     | X     | X     |
| GPPVATTPLPPHLSAEETPLFLADSVIPK                   | X     | X     | X     | X     | X     | X     |
| KGEVSCCWICTACK                                  |       | X     | X     | X     | X     |       |
| KLLDFLIK                                        | X     | X     | X     | X     | X     | X     |
| KPIAGVIGPGSSSSVAIQVQNLLQLFDIPQIAYSATSIDLSDK     |       |       |       | X     | X     |       |
| KPIAGVIGPGSSSSVAIQVQNLLQLFDIPQIAYSATSIDLSDKTLYK |       |       |       |       | X     |       |
| LGVVGEFSLIGSDGWADR                              |       |       | X     | X     | X     |       |
| LLDFLIK                                         | X     |       | X     | X     |       | X     |
| LLQEFVYER                                       | X     |       |       | X     | X     | X     |
| LLVGLSSAMCYSALVTK                               | X     |       | X     | X     | X     | X     |
| LPGHLLNPNNFK                                    | X     | X     | X     | X     | X     | X     |
| LPGHLLNPNNFKK                                   | X     | X     |       |       |       | X     |
| LTPEDSPALTPSPFR                                 | X     | X     | X     | X     | X     | X     |
| MDGDVIIIGALFSVHHQPPAEK                          | X     | X     | X     | X     | X     | X     |
| MHVGDGKLPCR                                     |       |       |       | X     | X     |       |
| MYIIIAKPER                                      | X     | X     | X     | X     | X     | X     |
| NPWFPEFWQHR                                     | X     | X     | X     | X     | X     |       |
| <i>RQPEFSPSSQCPSAHVQL</i>                       |       | X     | X     | X     |       |       |
| RGPPVATTPLPPHLSAEETPLFLADSVIPK                  | X     | X     | X     | X     | X     |       |
| <i>QPEFSPSSQCPSAHVQL</i>                        |       |       | X     | X     | X     | X     |
| SAFTTSDVVR                                      | X     |       | X     | X     | X     | X     |
| SFDDYFLK                                        | X     | X     |       | X     |       |       |
| SLYPPPPPPQHLQMLPLQLSTFR                         |       |       | X     |       |       | X     |
| SNTFLNIFR                                       | X     | X     |       | X     |       |       |
| SSFVGVSGEEVWFDEK                                | X     | X     | X     | X     | X     | X     |
| SSFVGVSGEEVWFDEKGDAPGR                          | X     | X     | X     | X     | X     | X     |

|                                    |   |   |   |   |   |   |
|------------------------------------|---|---|---|---|---|---|
| SLMDQLQGVTNFGSGIPDFHAVLAGPGTPGNGLR |   |   | X | X | X |   |
| SVSWSEPGGR                         | X |   |   |   |   |   |
| TLYNVEEEDNTPSTHFSPSPSMVVHR         |   |   |   | X | X |   |
| TNETACNQTAVIKPLTK                  | X | X | X | X | X | X |
| VEAMFHTLDK                         | X | X | X | X | X | X |
| VVVCFCGMTVR                        | X | X | X | X | X | X |
| YDIMNLQYTEANR                      | X | X | X | X | X | X |
| YDYVHVGTWHEGVLNIDDYK               | X | X | X | X |   | X |
