# Supplementary material for: Protein Networks Associated with Native Metabotropic Glutamate 1 Receptors (mGlu1) in the Mouse Cerebellum
Source: MDPI journal article supplement (doi:10.3390/cells12091325), 2023-05-05
Supplement: s1 [file s1]

**Supplementary Table S5. Pathway enrichment analysis of network proteins.**

Pathway source and name are displayed in columns 1 and 2; protein numbers and percentage are shown in columns 3 and 4; p-values and p values corrected for multiple comparisons are in columns 5 and 6; NCBI gene IDs are shown in column 7 and fold enrichment in column 8.

| Category         | Term                                                       | Count | %        | PValue   | FDR      | Genes                                                                               | Fold Enrichment |
|------------------|------------------------------------------------------------|-------|----------|----------|----------|-------------------------------------------------------------------------------------|-----------------|
| KEGG_PATHWAY     | mmu04724:Glutamatergic synapse                             | 12    | 27,27273 | 1,68E-13 | 1,66E-11 | 14816, 18752, 13385, 58234, 14681, 224997, 14688, 14812, 26558, 14810, 20512, 16438 | 27,3011378      |
| REACTOME_PATHWAY | R-MMU-6794362~Protein-protein interactions at synapses     | 7     | 15,90909 | 2,36E-07 | 2,67E-05 | 14816, 13385, 58234, 224997, 14812, 26558, 14810                                    | 25,0450337      |
| KEGG_PATHWAY     | mmu04713:Circadian entrainment                             | 7     | 15,90909 | 1,50E-06 | 3,72E-05 | 18752, 14681, 14688, 12323, 14812, 14810, 16438                                     | 18,3632653      |
| REACTOME_PATHWAY | R-MMU-5578775~Ion homeostasis                              | 6     | 13,63636 | 1,99E-06 | 1,28E-04 | 20541, 12323, 98660, 11931, 232975, 16438                                           | 27,2467949      |
| KEGG_PATHWAY     | mmu04720:Long-term potentiation                            | 6     | 13,63636 | 4,63E-06 | 7,30E-05 | 14816, 18752, 12323, 14812, 14810, 16438                                            | 23,0226013      |
| KEGG_PATHWAY     | mmu05022:Pathways of neurodegeneration - multiple diseases | 11    | 25       | 5,90E-06 | 7,30E-05 | 14816, 22190, 18752, 19122, 13385, 11739, 11949, 12323, 14812, 14810, 16438         | 6,00412496      |
| REACTOME_PATHWAY | R-MMU-6794361~Neurexins and neuroligins                    | 5     | 11,36364 | 7,00E-06 | 3,96E-04 | 14816, 13385, 58234, 224997, 26558                                                  | 38,0869176      |
| REACTOME_PATHWAY | R-MMU-112315~Transmission across Chemical Synapses         | 8     | 18,18182 | 1,34E-05 | 6,20E-04 | 18752, 22318, 13385, 14688,                                                         | 9,49302066      |

|                  |                                                                              |   |          |          |          |                                                           |            |
|------------------|------------------------------------------------------------------------------|---|----------|----------|----------|-----------------------------------------------------------|------------|
|                  |                                                                              |   |          |          |          | 12323, 14812,<br>14810, 20512                             |            |
| KEGG_PATHWAY     | mmu04022:cGMP-PKG signaling pathway                                          | 7 | 15,90909 | 3,98E-05 | 3,94E-04 | 20541, 11739,<br>16531, 98660,<br>11931, 232975,<br>16438 | 10,4023121 |
| KEGG_PATHWAY     | mmu04730:Long-term depression                                                | 5 | 11,36364 | 7,13E-05 | 5,80E-04 | 14816, 18752,<br>14804, 14681,<br>16438                   | 21,4238095 |
| REACTOME_PATHWAY | R-MMU-438066~Unblocking of NMDA receptors, glutamate binding and activation  | 4 | 9,090909 | 9,33E-05 | 0,003013 | 13385, 12323,<br>14812, 14810                             | 42,9343434 |
| KEGG_PATHWAY     | mmu05017:Spinocerebellar ataxia                                              | 6 | 13,63636 | 1,70E-04 | 0,001051 | 14816, 18752,<br>11739, 14812,<br>14810, 16438            | 10,9398176 |
| KEGG_PATHWAY     | mmu05017:Spinocerebellar ataxia                                              | 6 | 13,63636 | 1,70E-04 | 0,001051 | 14816, 18752,<br>11739, 14812,<br>14810, 16438            | 10,9398176 |
| REACTOME_PATHWAY | R-MMU-112314~Neurotransmitter receptors and postsynaptic signal transmission | 6 | 13,63636 | 2,15E-04 | 0,005713 | 18752, 13385,<br>14688, 12323,<br>14812, 14810            | 10,4178922 |
| KEGG_PATHWAY     | mmu04020:Calcium signaling pathway                                           | 7 | 15,90909 | 2,43E-04 | 0,001415 | 14816, 18752,<br>20541, 11739,<br>12323, 14810,<br>16438  | 7,49833333 |
| REACTOME_PATHWAY | R-MMU-442755~Activation of NMDA receptors and postsynaptic events            | 4 | 9,090909 | 4,16E-04 | 0,009506 | 13385, 12323,<br>14812, 14810                             | 26,2376543 |
| KEGG_PATHWAY     | mmu05020:Prion disease                                                       | 7 | 15,90909 | 4,40E-04 | 0,002177 | 12391, 19122,<br>11739, 11949,<br>14812, 14810,<br>16438  | 6,71492537 |
| REACTOME_PATHWAY | R-MMU-5673001~RAF/MAP kinase cascade                                         | 7 | 15,90909 | 6,19E-04 | 0,012718 | 22190, 240057,<br>13385, 54401,<br>12323, 14812,<br>14810 | 6,30905428 |

|                  |                                                                                      |   |          |          |          |                                                  |            |
|------------------|--------------------------------------------------------------------------------------|---|----------|----------|----------|--------------------------------------------------|------------|
| REACTOME_PATHWAY | R-MMU-5684996~MAPK1/MAPK3 signaling                                                  | 7 | 15,90909 | 6,98E-04 | 0,013708 | 22190, 240057, 13385, 54401, 12323, 14812, 14810 | 6,1678068  |
| REACTOME_PATHWAY | R-MMU-5683057~MAPK family signaling cascades                                         | 7 | 15,90909 | 0,001073 | 0,01865  | 22190, 240057, 13385, 54401, 12323, 14812, 14810 | 5,68031691 |
| KEGG_PATHWAY     | mmu04024:cAMP signaling pathway                                                      | 6 | 13,63636 | 0,001303 | 0,005158 | 12323, 98660, 14812, 14810, 11931, 232975        | 7,01142857 |
| REACTOME_PATHWAY | R-MMU-936837~Ion transport by P-type ATPases                                         | 4 | 9,090909 | 0,001374 | 0,022994 | 12323, 98660, 11931, 232975                      | 17,4917695 |
| KEGG_PATHWAY     | mmu04723:Retrograde endocannabinoid signaling                                        | 5 | 11,36364 | 0,002221 | 0,008142 | 14816, 18752, 14681, 14688, 16438                | 8,68532819 |
| REACTOME_PATHWAY | R-MMU-8849932~Synaptic adhesion-like molecules                                       | 3 | 6,818182 | 0,003293 | 0,051319 | 13385, 14812, 14810                              | 33,734127  |
| KEGG_PATHWAY     | mmu04727:GABAergic synapse                                                           | 4 | 9,090909 | 0,004485 | 0,013876 | 57138, 18752, 14681, 14688                       | 11,5544141 |
| REACTOME_PATHWAY | R-MMU-399719~Trafficking of AMPA receptors                                           | 3 | 6,818182 | 0,005419 | 0,074221 | 18752, 13385, 12323                              | 26,2376543 |
| REACTOME_PATHWAY | R-MMU-399721~Glutamate binding, activation of AMPA receptors and synaptic plasticity | 3 | 6,818182 | 0,005419 | 0,074221 | 18752, 13385, 12323                              | 26,2376543 |
| KEGG_PATHWAY     | mmu04014:Ras signaling pathway                                                       | 5 | 11,36364 | 0,011374 | 0,030432 | 18752, 240057, 14688, 14812, 14810               | 5,46990881 |
