# Supplementary material for: Protein Networks Associated with Native Metabotropic Glutamate 1 Receptors (mGlu1) in the Mouse Cerebellum
Source: MDPI journal article supplement (doi:10.3390/cells12091325), 2023-05-05
Supplement: s1 [file s1]

| Uniprot ID | Degree | Belongs-to           | Centrality | Function            | hgnc    | Human Readable Label | mgd           | NCBI ID                                                                                  | protein name                                                            | refseq                            | Taxonomy ID                                                                                                                                                                                   | uniprot                  |
|------------|--------|----------------------|------------|---------------------|---------|----------------------|---------------|------------------------------------------------------------------------------------------|-------------------------------------------------------------------------|-----------------------------------|-----------------------------------------------------------------------------------------------------------------------------------------------------------------------------------------------|--------------------------|
| P14904     | 124    | 0.5336707185052403   |            | transporter         | Atp1b1  | ATP1B1               | NP_033851.1   | Sodium/potassium-transporting ATPase subunit beta-1                                      | NP_033851                                                               | 10090                             | Aqphb1 ATPH_MOUSE Aqphb1 Sodium/potassium-dependent ATPase subunit beta-1 [P14904] ATP1B1                                                                                                     |                          |
| P18874     | 183    | 0.36622260457153455  |            | adaptor protein     | Nyctn1  | NYCTN1               | NP_033869.1   | 14-3-3 protein tau                                                                       | NP_033869                                                               | 10090                             | L43T7_RAT YWHAG_Pt2474 L43T7_MOUSE                                                                                                                                                            |                          |
| Q61425     | 57     | 0.16010714825520585  |            | receptor            | Gri2d   | GRIE2                | NP_032193.1   | Gluamate receptor ionotropic, delta 2                                                    | NP_032193                                                               | 10090                             | GRIE2I_Q61425 GRIE2_MOUSE                                                                                                                                                                     |                          |
| P18281     | 56     | 0.137268237479117    |            | channel             | Irgp1   | ITRG1                | NP_034715.3   | Inositol 1,4,5-trisphosphate receptor type 1                                             | NP_034715                                                               | 10090                             | ITRG1I_P18281 ITRG1_MOUSE                                                                                                                                                                     |                          |
| P62874     | 56     | 0.11240713375428424  |            | C protein           | Gab1    | GAB1                 | NP_01153488.1 | Guanine nucleotide-binding protein G <i>o</i> (G <i>i</i> )G <i>c</i> (F) subunit beta-1 | NP_01153488 NP_01153489 NP_032168 NP_017175466                          | 10090                             | GIBI_MOUSE QTG2Q_MOUSE GBH1_HUMAN GNB1_GBH1_CANLF_BOVIN P62874                                                                                                                                |                          |
| P49482     | 49     | 0.11239901812601214  |            | transporter         | Slc25a4 | SLC25A4              | NP_031476.3   | ADP/ATP translocator 3                                                                   | NP_031476                                                               | 10090                             | ADTL_MOUSE P49482 SLC25A4                                                                                                                                                                     |                          |
| P19682     | 40     | 0.07166621534746794  |            | adaptor protein     | Ywhag   | YWHAG                | NP_061359.2   | 14-3-3 protein gamma                                                                     | NP_061359                                                               | 10090                             | P19682_YWHAG                                                                                                                                                                                  |                          |
| AAQUG1     | 39     | 0.10140222041480193  |            |                     | Gai2d   |                      |               |                                                                                          |                                                                         | 10090                             | AAQUG1_Gai2d                                                                                                                                                                                  |                          |
| P58802     | 31     | 0.06635542584265702  |            | membrane protein    | Gpm1a   | GPMA1A               | NP_705809.1   | Neuronal membrane glycoprotein M6-a                                                      | NP_02140685 NP_02140683 NP_705809                                       | 10090                             | GPMA1A_Gpm1a P58802 Msa_GPMA1_MOUSE                                                                                                                                                           |                          |
| Q2J6R8     | 31     | 0.04857030213007591  |            |                     |         |                      |               | 14-3-3 protein tau                                                                       |                                                                         | 10090                             | QJUNH_14-3-3 protein tau Q680P QTTW06_Ywhag Q5SF76_P55216 QJL423                                                                                                                              |                          |
| P26852     | 30     | 0.05759291730136208  |            | kinase              | Camk2b  | KCCB_MOUSE           | Camk2b        | NP_01167524.1                                                                            | Calcium/calmodulin-dependent protein kinase type I $\beta$ subunit beta | NP_01167524 NP_031621 NP_01167525 | 10090                                                                                                                                                                                         | CAMK2B_P26852 KCCB_MOUSE |
| QVIMD8     | 29     | 0.0474486119423986   |            | transporter         | Slc25a3 | SLC25A3              | NP_598429.1   | Phosphate carrier protein, mitochondrial                                                 | NP_598429                                                               | 10090                             | SLC25A3 QVIMD8 MPC_MOUSE                                                                                                                                                                      |                          |
| P63318     | 26     | 0.0312264366869253   |            | kinase              | Prkg    | PRKG                 | NP_035252.1   | Protein kinase C gamma type                                                              | NP_035252                                                               | 10090                             | PRCKC_KPGC_MOUSE P63318                                                                                                                                                                       |                          |
| QV19R2     | 24     | 0.04854314566712305  |            | enzyme              | Atp6cl1 | ATP6CL1              | NP_065640.2   | ATP synthase subunit gamma, mitochondrial                                                | NP_065640 NP_01102639                                                   | 10090                             | ATPC_MOUSE P47598_F3 Subunit gamma Atp6cl1 ATPC1 Atp6cl1 QV19R2_F-ATPase gamma subunit                                                                                                        |                          |
| QV51Y8     | 24     | 0.0659277125235367   |            |                     | Camk2d  |                      |               |                                                                                          |                                                                         | 10090                             | Camk2d QV51Y8 Camk2b                                                                                                                                                                          |                          |
| QULN99     | 24     | 0.0415440754327766   |            |                     | Ywhag   |                      |               |                                                                                          |                                                                         | 10090                             | QULN99_Ywhag                                                                                                                                                                                  |                          |
| P09772     | 21     | 0.02508101377508844  |            | receptor            | Gral1   | GRAL1                | NP_058672.1   | Mitochondrial glutamate receptor 1                                                       | NP_058672 NP_01107853 NP_058672                                         | 10090                             | GRM1_MOUSE P09772 Gral1                                                                                                                                                                       |                          |
| Q497C0     | 21     | 0.0321018716754555   |            | transporter         | Atpla3  | ATPLA3               | NP_01361556.1 | Sodium/potassium-transporting ATPase subunit alpha-3                                     | NP_01361556 NP_01277398                                                 | 10090                             | QQLN ATPLA3 ATPLA3 ATLA3_MOUSE pump-subunit alpha-3 Na(+)/K(+) ATPase alpha[III] subunit                                                                                                      |                          |
| QV9B5      | 20     | 0.03754524324362563  |            | transporter         | Atpla2  | ATPLA2               | NP_848492.1   | Sodium/potassium-transporting ATPase subunit alpha-2                                     | NP_848492                                                               | 10090                             | ATPLA2_MOUSE QV9B5 ATPLA2                                                                                                                                                                     |                          |
| P18872     | 20     | 0.02744665921940483  |            |                     | Gnao1   | GNAO1                | NP_034438.1   | Guanine nucleotide-binding protein G <i>o</i> (s) subunit alpha                          | NP_034438 NP_01106855                                                   | 10090                             | GNADO GNADO_MOUSE Q4382_MOUSE P18872                                                                                                                                                          |                          |
| P09567     | 20     | 0.02657964140785048  |            |                     | Prkg    |                      |               |                                                                                          |                                                                         | 10090                             | Prkg Prkg Prkg Prkg Prkg                                                                                                                                                                      |                          |
| P16330     | 16     | 0.02411027236828295  |            | enzyme              | Cnp     | CNP                  | NP_01139700.1 | 2',3'-cyclic-nucleotide 3'-phosphodiesterase                                             | NP_01139700 NP_034053                                                   | 10090                             | P16330_CNP CNP_MOUSE                                                                                                                                                                          |                          |
| Q9YL63     | 16     | 0.03224664768295682  |            |                     | Rub     |                      |               |                                                                                          |                                                                         | 10090                             | P20943 Rub Pde1 Inagrp Protein PCD-6 P3 receptor isoform 1 Parkinje cell protein 1 Type 1 Inositol 1,4,5-trisphosphate receptor Inositol 1,4,5-trisphosphate-binding protein P300 Q9YL63 Ipr1 |                          |
| P22239     | 15     | 0.0854308314641744   |            |                     | Ywhae   | YWHAE                |               |                                                                                          |                                                                         | 10090                             | YWHAE LATIE_BOVIN LATIE_SHEEP 143SE_MOUSE 143SE_HUMAN 143SE_RAT P22239                                                                                                                        |                          |
| QCQD08     | 15     | 0.09203087261446743  |            |                     | Ywhab   | YWHAB                | NP_061223     |                                                                                          |                                                                         | 10090                             | QCQCN_YWHAB 143SB_MOUSE                                                                                                                                                                       |                          |
| Q9J9P6     | 14     | 0.019394356915620768 |            | scaffolding protein | Homer3  | HOMER3_MOUSE         | Homer3        | NP_01139625.1                                                                            | Homer protein homolog 3 (Homer-3)                                       | NP_036114 NP_01139625             | 10090</                                                                                                                                                                                       |                          |



|                     |     |     |         |                     |        |  |                                                                    |       |                                                                                    |
|---------------------|-----|-----|---------|---------------------|--------|--|--------------------------------------------------------------------|-------|------------------------------------------------------------------------------------|
| Q99Y19              | 1   | 0.0 |         | ACTR3               | Actr3  |  | NP_076224 NP_001192315 NP_001192314                                | 10090 | ACTR3 Q99Y19                                                                       |
| P25801              | 1   | 0.0 |         | LMC2                |        |  |                                                                    | 10090 | LMC2 P25801                                                                        |
| P68879              | 1   | 0.0 | Snap25  | Snap25_MOUSE        | Snap25 |  | NP_001277985 NP_035558                                             | 10090 | Snap25 SNAIP25_MOUSE P68879                                                        |
| Q88B00              | 1   | 0.0 |         | IQCB1               | Iqcb1  |  | NP_796102                                                          | 10090 | IQCB1 Q88B00                                                                       |
| P97449              | 1   | 0.0 |         | ANP1P               |        |  |                                                                    | 10090 | ANP1P P97449                                                                       |
| Q9P783              | 1   | 0.0 |         | SARM1               |        |  |                                                                    | 10090 | SARM1 Q9P783                                                                       |
| P30311              | 1   | 0.0 |         | RAB1A               |        |  |                                                                    | 10090 | RAB1A P30311                                                                       |
| Q9Z1L4              | 1   | 0.0 | Rsl1    | RS1                 |        |  |                                                                    | 10090 | RS1 Rsl1 Q9Z1L4 X-linked juvenile retinoschisis protein homolog Xlrsl1_MOUSE Rsl1h |
| Q9WV18              | 1   | 0.0 | Gabbt1  | GABBR1              | Gabbt1 |  | NP_062312                                                          | 10090 | GABBR1 GABR1_MOUSE Q9WV18                                                          |
| O55222              | 1   | 0.0 |         | ILK                 |        |  |                                                                    | 10090 | O55222 ILK                                                                         |
| Q9QXD6              | 1   | 0.0 |         | FBP1                | Fbp1   |  | NP_062268                                                          | 10090 | Q9QXD6 FBP1                                                                        |
| O70589              | 1   | 0.0 |         | CASK                |        |  |                                                                    | 10090 | O70589 CASK                                                                        |
| P23819              | 1   | 0.0 |         | GRIA2               |        |  |                                                                    | 10090 | GRIA2 P23819                                                                       |
| P76151              | 1   | 0.0 |         | LRHA                | Lrha   |  | NP_034829 NP_001129541                                             | 10090 | LRHA P76151                                                                        |
| Q9VDU0              | 1   | 0.0 |         | GPSM2               | Gpsm2  |  | NP_083798                                                          | 10090 | GPSM2 Q9VDU0                                                                       |
| P12660              | 1   | 0.0 |         | PCP2                | Pcp2   |  | NP_032816 NP_001123276 NP_001123275                                | 10090 | PCP2 P12660 PCP2_MOUSE                                                             |
| P12123              | 1   | 0.0 | App     | APP                 | App    |  | NP_031497 NP_001185753 NP_001185752 NP_001185753 NP_001185754      | 10090 | APP A4_MOUSE P12123                                                                |
| P97428              | 1   | 0.0 | Rgl16   | RG16                | Rgl16  |  | NP_033397                                                          | 10090 | RG16 A_MOUSE RG25 P97428                                                           |
| Q9JKB3              | 1   | 0.0 |         | Ybc3                | Ybc3   |  | NP_620817 NP_035863                                                | 10090 | Q9JKB3 YBCO3_MOUSE YBC3                                                            |
| P38467              | 1   | 0.0 | Hsp49   | GRP73_MOUSE         |        |  | NP_034611                                                          | 10090 | HSP49 P38467 GRP73_MOUSE                                                           |
| Q9Y1Q6              | 1   | 0.0 | Gpc4    | BP44                | Eyp44  |  | NP_083848                                                          | 10090 | Q9Y1Q6 BP44 BP44_MOUSE                                                             |
| P60670              | 1   | 0.0 |         | NFXC4               | Nfxc4  |  | NP_001181932 NP_953763                                             | 10090 | NFXC4 P60670                                                                       |
| P70362              | 1   | 0.0 |         | UFD1L               | Ufd1l  |  | NP_035802                                                          | 10090 | UFD1L P70362 UFD1_MOUSE                                                            |
| Q8BF29              | 1   | 0.0 |         | IRL12_MOUSE         | Irl12  |  | NP_705820                                                          | 10090 | IRL12_MOUSE Q8BF29 IRL12_MOUSE                                                     |
| Q9CKC9              | 1   | 0.0 |         | Rnf170              | Rnf170 |  | NP_084241                                                          | 10090 | RNF170_MOUSE Q9CKC9 RNF170                                                         |
| Q9E800              | 1   | 0.0 | Ube4b   | UBE4B               | Ube4b  |  | NP_071305                                                          | 10090 | Q9E800 UBE4B UBE4B_MOUSE                                                           |
| Q01853              | 1   | 0.0 | Vcp     | VCP                 | Vcp    |  | NP_033529                                                          | 10090 | Q01853 VCP VCP_MOUSE                                                               |
| Q60912              | 1   | 0.0 | Vdac1   | VDAC1               |        |  |                                                                    | 10090 | VDAC1_MOUSE Q60912 VDAC1                                                           |
| Q9CKA20             | 0.0 |     |         | TRC4                | Trpc4  |  | NP_0340612 NP_001240611 NP_038680                                  | 10090 | Q9CKA20 TRC4 TRC4_MOUSE                                                            |
| Q8BFN8              | 1   | 0.0 |         | DMXL2               | Dmxl2  |  | NP_766359                                                          | 10090 | Q8BFN8 DMXL2                                                                       |
| Q9JF54              | 1   | 0.0 | Ldb3    | LD3                 | Ldb3   |  | NP_001034165 NP_036048 NP_001034163 NP_001034162 NP_001034161 NP_0 | 10090 | Q9JF54 LD3 LD3_MOUSE                                                               |
| Q88860              | 1   | 0.0 | Cgpc    | CPC                 | Cgpc   |  | NP_444417 NP_001186201                                             | 10090 | CGPC Q88860 CPC_MOUSE                                                              |
| Q88171              | 1   | 0.0 | Chn1    | CHN1                | Chn1   |  | NP_062600                                                          | 10090 | Q88171 CHN1_MOUSE CHN1                                                             |
| Q9WU22              | 1   | 0.0 | Ptpn4   | PTN4_MOUSE          |        |  | NP_064317                                                          | 10090 | Q9WU22 PTN4_MOUSE PTPN4                                                            |
| Q9CWC9              | 1   | 0.0 |         | GAB2IP              | Gab2ip |  | NP_001152793 NP_579933                                             | 10090 | Q9CWC9 GAB2IP                                                                      |
| BV12N1              | 1   | 0.0 |         | PTPN                |        |  |                                                                    | 10090 | BV12N1 PTPN                                                                        |
| C88531              | 1   | 0.0 |         | PPT1                |        |  |                                                                    | 10090 | PPT1 C88531                                                                        |
| C88597              | 1   | 0.0 | Becn1   | BECN1               | Becn1  |  | NP_062530                                                          | 10090 | BECN1 C88597 BECN1_MOUSE                                                           |
| P10126              | 1   | 0.0 |         | EIF1A1              |        |  |                                                                    | 10090 | EIF1A1 P10126                                                                      |
| P11214              | 1   | 0.0 |         | PLAT                |        |  |                                                                    | 10090 | P11214 PLAT                                                                        |
| P14106              | 1   | 0.0 |         | P14106              |        |  |                                                                    | 10090 | C1 Q8 P14106                                                                       |
| P16858              | 1   | 0.0 |         | GAPDH               |        |  |                                                                    | 10090 | P16858 GAPDH                                                                       |
| P20152              | 1   | 0.0 |         | VIM                 |        |  |                                                                    | 10090 | P20152 VIM                                                                         |
| P49312              | 1   | 0.0 |         | HENNPA1             |        |  |                                                                    | 10090 | P49312 HENNPA1                                                                     |
| P54320              | 1   | 0.0 |         | ELN                 |        |  |                                                                    | 10090 | P54320 ELN                                                                         |
| P62908              | 1   | 0.0 |         | RFS3                |        |  |                                                                    | 10090 | P62908 RFS3                                                                        |
| Q9F226              | 1   | 0.0 |         | FAT2                |        |  |                                                                    | 10090 | Q9F226 FAT2                                                                        |
| Q60963              | 1   | 0.0 |         | PLA2G7              |        |  |                                                                    | 10090 | Q60963 PLA2G7                                                                      |
| Q64332              | 1   | 0.0 |         | SYN2                |        |  |                                                                    | 10090 | Q64332 SYN2                                                                        |
| Q8QNM0              | 1   | 0.0 |         | BRH1                |        |  |                                                                    | 10090 | BRH1 Q8QNM0                                                                        |
| Q913V1              | 1   | 0.0 |         | SFXN3               |        |  |                                                                    | 10090 | SFXN3 Q913V1                                                                       |
| Q923N0              | 1   | 0.0 |         | SFXN5               |        |  |                                                                    | 10090 | Q923N0 SFXN5                                                                       |
| Q99JR1              | 1   | 0.0 |         | SFXN1               |        |  |                                                                    | 10090 | SFXN1 Q99JR1                                                                       |
| Q9C584              | 1   | 0.0 |         | NEXN1               |        |  |                                                                    | 10090 | NEXN1 Q9C584                                                                       |
| Q9CWF2              | 0.0 |     |         | TUBB2B              |        |  |                                                                    | 10090 | TUBB2B Q9CWF2                                                                      |
| Q9D4E4              | 1   | 0.0 |         | TTCB8               |        |  |                                                                    | 10090 | Q9D4E4 TTCB8                                                                       |
| Q9DM63              | 1   | 0.0 |         | SLC25A22            |        |  |                                                                    | 10090 | Q9DM63 SLC25A22                                                                    |
| Q9DM81              | 1   | 0.0 |         | SLC25A18            |        |  |                                                                    | 10090 | SLC25A18 Q9DM81                                                                    |
| Q9CWF6              | 1   | 0.0 |         | SRCN3               |        |  |                                                                    | 10090 | Q9CWF6 SRCN3                                                                       |
| Q9WLR2              | 1   | 0.0 |         | BC2                 |        |  |                                                                    | 10090 | Q9WLR2 BC2                                                                         |
| P15806              | 1   | 0.0 |         | TFE2_MOUSE          | Tcf2   |  | NP_001157624 NP_001157623 NP_001157625 NP_001157619 NP_035678 NP_0 | 10090 | TFE2_MOUSE P15806 TCF3                                                             |
| P53404              | 1   | 0.0 |         | ZAP70               |        |  |                                                                    | 10090 | P53404 ZAP70                                                                       |
| P23804              | 1   | 0.0 | Mdm2    | MDM2                | Mdm2   |  | NP_001275515 NP_034916                                             | 10090 | P23804 MDM2_MOUSE MDM2                                                             |
| Q9D1F4              | 1   | 0.0 | Akt1a1  | AKT1S1              | Akt1a1 |  | NP_080546 NP_001277623 NP_001240849                                | 10090 | AKT1S1_MOUSE AKT1S1 Q9D1F4                                                         |
| Q9K4Q0              | 1   | 0.0 |         | RPTOR               |        |  |                                                                    | 10090 | RPTOR RPTOR_MOUSE Q9K4Q0                                                           |
| Q9C1F2              | 1   | 0.0 | Trim32  | TRB2_MOUSE          |        |  | XP_006382999 NP_444314 NP_001155254                                | 10090 | TRB2_MOUSE Q9C1F2 TRB2_MOUSE                                                       |
| P11688              | 1   | 0.0 | Iga5    | ITAS_MOUSE          |        |  | NP_034707                                                          | 10090 | P11688 ITCAS ITAS_MOUSE                                                            |
| P13242              | 1   | 0.0 | Gja1    | CXA1_MOUSE          |        |  | NP_034618                                                          | 10090 | CXA1_MOUSE GJA1 P13242                                                             |
| Q9U1P9              | 1   | 0.0 |         | PAC1                |        |  |                                                                    | 10090 | PAC1 Q9U1P9                                                                        |
| Q9NXE1              | 1   | 0.0 |         | RICB8               |        |  |                                                                    | 10090 | RICB8 Q9NXE1                                                                       |
| P35991              | 1   | 0.0 | Btk     | BTk                 | Btk    |  | NP_038510                                                          | 10090 | P35991 BTk_MOUSE BTk                                                               |
| Q99MK8              | 1   | 0.0 | Grk2    | ADRBK1              | Adrbk1 |  | NP_001277427 NP_570933                                             | 10090 | ADRBK1 ADRBK1_MOUSE Q99MK8                                                         |
| P20263              | 1   | 0.0 | Pou4f1  | PCUSP1              | Pou4f1 |  | NP_038661 NP_001239041                                             | 10090 | PCUSP1_MOUSE P20263 POUSP1                                                         |
| C88485              | 1   | 0.0 |         | DYNC11              | Dync11 |  | NP_034193 NP_001177955 NP_001177956 NP_001177954 NP_001177952      | 10090 | C88485 DYNC11                                                                      |
| P68040              | 1   | 0.0 |         | GNBL1               | Gnbl1  |  | NP_032169                                                          | 10090 | P68040 GNBL1                                                                       |
| P48678              | 1   | 0.0 |         | LMNA                | Lmna   |  | NP_062631 NP_00104572 NP_001020311                                 | 10090 | LMNA P48678                                                                        |
| Q95512              | 1   | 0.0 |         | MAR2                |        |  | NP_031454 NP_001073899 NP_001073898 NP_001073857                   | 10090 | Q95512 MARB2                                                                       |
| Q91X12              | 1   | 0.0 |         | LNK2                |        |  |                                                                    | 10090 | Q91X12 LNK2                                                                        |
| Q03141              | 1   | 0.0 |         | MAR3                | Mark3  |  | NP_073712 NP_067491                                                | 10090 | MAR3 Q03141                                                                        |
| Q9CP07              | 1   | 0.0 |         | PRKD2               | Pkcd2  |  | NP_086822                                                          | 10090 | Q9CP07 PRKD2                                                                       |
| Q92596              | 1   | 0.0 |         | NBLRL1              | Nblrl1 |  | NP_001154952 NP_067335                                             | 10090 | NBLRL1 Q92596                                                                      |
| P11416              | 1   | 0.0 |         | RARA                | Rara   |  | NP_001169999 NP_001170774 NP_001170773 NP_033050                   | 10090 | P11416 RARA RARA_MOUSE                                                             |
| C35618              | 1   | 0.0 |         | MDM4                | Mdm4   |  | NP_032601                                                          | 10090 | C35618 MDM4                                                                        |
| Q7TF98              | 1   | 0.0 |         | MYCBP2              |        |  |                                                                    | 10090 | Q7TF98 MYCBP2                                                                      |
| P11798              | 1   | 0.0 | Camk2a  | KCC2A_MOUSE         | Camk2a |  | NP_033922 NP_803126 NP_001273738                                   | 10090 | KCC2A_MOUSE CAMK2A P11798                                                          |
| Q61584              | 1   | 0.0 |         | FXR1                |        |  |                                                                    | 10090 | FXR1 Q61584                                                                        |
| Q55Q26              | 1   | 0.0 |         | CYP17               |        |  |                                                                    | 10090 | CYP17 Q55Q26                                                                       |
| P42137              | 1   | 0.0 |         | PKS3A               | Pks3a  |  | NP_032865                                                          | 10090 | PKS3A PKS3A_MOUSE P42137                                                           |
| Q99N57              | 1   | 0.0 |         | RAF1                | Raf1   |  | NP_084056                                                          | 10090 | RAF1_MOUSE Q99N57 RAF1                                                             |
| Q61037              | 1   | 0.0 |         | TSC2                |        |  |                                                                    | 10090 | Q61037 TSC2                                                                        |
| Q9W931              | 1   | 0.0 | Arc     | ARC                 | Arc    |  | NP_001263613 NP_061280                                             | 10090 | Q9W931 ARC ARC_MOUSE                                                               |
| Q9JF28              | 1   | 0.0 | Fli1    | FLI1                | Fli1   |  | NP_071292                                                          | 10090 | Q9JF28 FLI1 FLI1_MOUSE                                                             |
| A2CG49              | 1   | 0.0 |         | KALRN               |        |  |                                                                    | 10090 | A2CG49 KALRN                                                                       |
| URS00002620A7_10090 | 1   | 0.0 |         | URS00002620A7_10090 |        |  |                                                                    | 10090 |                                                                                    |
| 2675810             | 1   | 0.0 | Septin4 | 2675810             |        |  | XP_00652556                                                        | 10090 |                                                                                    |
| 241045695           | 1   | 0.0 |         | 241045695           |        |  | XP_006515387                                                       | 10090 |                                                                                    |
| 186118204           | 1   | 0.0 |         | 186118204           |        |  | XP_017168713                                                       | 10090 |                                                                                    |
| P12960              | 1   | 0.0 | Cntn2   | CNTN2_MOUSE         |        |  | NP_001275133 NP_017171911                                          | 10090 | CNTN1_MOUSE P12960                                                                 |
| P31448              | 1   | 0.0 | Scn1a1  | SCNA1_MOUSE         |        |  | NP_848818                                                          | 10090 | P31448 SCNA1_MOUSE                                                                 |
| P99028              | 1   | 0.0 |         | QCR6_MOUSE          |        |  | NP_079917                                                          | 10090 | P99028 QCR6_MOUSE                                                                  |
| 129119946           | 1   | 0.0 |         | 129119946           |        |  | XP_006536971                                                       | 10090 |                                                                                    |
| P62032              | 1   | 0.0 |         | MYR_MOUSE           |        |  | NP_017171919                                                       | 10090 | P62032 MYR_MOUSE                                                                   |
| Q4VA93              | 1   | 0.0 |         | Q4VA93              |        |  | NP_035231                                                          | 10090 | Q4VA93 Q4VA93_MOUSE                                                                |
| Q61555              | 1   | 0.0 |         | FRN2_MOUSE          |        |  | NP_034311                                                          | 10090 | Q61555 FRN2_MOUSE                                                                  |

|           |   |     |         |             |  |       |  |  |  |                        |  |       |                                                                   |
|-----------|---|-----|---------|-------------|--|-------|--|--|--|------------------------|--|-------|-------------------------------------------------------------------|
| Q62277    | 1 | 0.0 | Syp     | SYPL_MOUSE  |  |       |  |  |  | NP_033331              |  | 10090 | SYPL_MOUSE Q62277                                                 |
| Q39P73    | 1 | 0.0 | Dtraa2  | DTRA2_MOUSE |  |       |  |  |  | NP_001019645           |  | 10090 | DTRA2_MOUSE Q39P73                                                |
| P35063    | 0 | 0.0 | Albac   | ALBAC_MOUSE |  |       |  |  |  | XP_006532096           |  | 10090 | P35063 ALBAC_MOUSE                                                |
| 3866731   | 1 | 0.0 | Syt2    | 3866731     |  |       |  |  |  | NP_033333              |  | 10090 |                                                                   |
| 102409979 | 1 | 0.0 |         | 102409979   |  |       |  |  |  | XP_006499116           |  | 10090 |                                                                   |
| Q9K539    | 1 | 0.0 | Ndub10  | NDUBA_MOUSE |  |       |  |  |  | NP_009060              |  | 10090 | Q9K539 NDUBA_MOUSE                                                |
| 126510573 | 1 | 0.0 |         | 126510573   |  |       |  |  |  | NP_006501641           |  | 10090 |                                                                   |
| P43024    | 1 | 0.0 | CxaA1   | CXA1_MOUSE  |  |       |  |  |  | NP_031774              |  | 10090 | CXA1_MOUSE P43024                                                 |
| A2A5Q1    | 1 | 0.0 |         | AGRN_MOUSE  |  |       |  |  |  |                        |  | 10090 | AGRN_MOUSE A2A5Q1                                                 |
| Q4P563.1  | 0 | 0.0 | Sarm1   | SARM1_MOUSE |  |       |  |  |  |                        |  | 10090 | Q4P563.1 Q4P563 SARM1_MOUSE                                       |
| Q8CR83    | 1 | 0.0 | Ank2    | ANK2_MOUSE  |  |       |  |  |  |                        |  | 10090 | Q8CR83 ANK2_MOUSE                                                 |
| P63028    | 1 | 0.0 | Tp1     | TCTP_MOUSE  |  |       |  |  |  | NP_034555              |  | 10090 | TCTP_MOUSE P63028                                                 |
| Q9Q209    | 1 | 0.0 | Rabcl   | PRAF1_MOUSE |  |       |  |  |  | NP_034991              |  | 10090 | PRAF1_MOUSE Q9Q209                                                |
| Q6Q238    | 1 | 0.0 | Canl1   | CAND1_MOUSE |  |       |  |  |  | NP_082270              |  | 10090 | CAN1_MOUSE Q6Q238                                                 |
| 106628779 | 1 | 0.0 |         | 106628779   |  |       |  |  |  | XP_006523998           |  | 10090 |                                                                   |
| 238678357 | 1 | 0.0 |         | 238678357   |  |       |  |  |  | XP_006496558           |  | 10090 |                                                                   |
| EP5115    | 1 | 0.0 | Prrt2   | PRT2_MOUSE  |  |       |  |  |  | NP_001096023           |  | 10090 | EP5115 PRT2_MOUSE                                                 |
| P97492    | 1 | 0.0 | Rgs14   | RG14_MOUSE  |  |       |  |  |  | NP_058038              |  | 10090 | RG14_MOUSE P97492                                                 |
| 152568194 | 1 | 0.0 |         | 152568194   |  |       |  |  |  | NP_038568              |  | 10090 |                                                                   |
| QACU36.1  | 1 | 0.0 | Shan2   | SHAN2_MOUSE |  |       |  |  |  |                        |  | 10090 | SHAN2_MOUSE QACU36 QACU36.1                                       |
| 2005137   | 1 | 0.0 | Gopc    | 2005137     |  |       |  |  |  | NP_444417              |  | 10090 |                                                                   |
| 172964819 | 1 | 0.0 |         | 172964819   |  |       |  |  |  | XP_006504712           |  | 10090 |                                                                   |
| Q61427    | 1 | 0.0 | Grib1   | GRI1_MOUSE  |  |       |  |  |  | NP_032192              |  | 10090 | GRI1_MOUSE Q61427                                                 |
| Q6Q238    | 1 | 0.0 | Shar2   | SHAN2_MOUSE |  |       |  |  |  |                        |  | 10090 | Q6Q238 SHAN2_MOUSE                                                |
| Q61426    | 1 | 0.0 | Grik5   | GRK5_MOUSE  |  | Grik5 |  |  |  | NP_032194              |  | 10090 | Q61426 GRK5_MOUSE                                                 |
| 26219267  | 1 | 0.0 | Grip2p  | 26219267    |  |       |  |  |  | NP_579933              |  | 10090 |                                                                   |
| Q6Q991    | 0 | 0.0 | Nrac2   | NRAC2_MOUSE |  |       |  |  |  | NP_035029              |  | 10090 | NRAC2_MOUSE Q6Q991                                                |
| Q5D052    | 1 | 0.0 | Home1   | Q5D052      |  |       |  |  |  | NP_036112              |  | 10090 | Q5D052_MOUSE Q5D052                                               |
| Q8B57.1   | 1 | 0.0 | Pak     | PAK_MOUSE   |  |       |  |  |  |                        |  | 10090 | Q8B57 PAK_MOUSE Q8B57.1                                           |
| Q8B57.2   | 1 | 0.0 | Pak     | Q8B57.2     |  |       |  |  |  |                        |  | 10090 | Q8B57.2                                                           |
| Q9Y128    | 1 | 0.0 | Dab2    | DDAIF_MOUSE |  |       |  |  |  | XP_006524675           |  | 10090 | Q9Y128 DDAIF_MOUSE                                                |
| A2AAJ9    | 1 | 0.0 |         | OBSCN_MOUSE |  |       |  |  |  | NP_001268781 NP_033140 |  | 10090 | OBSCN_MOUSE A2AAJ9                                                |
| P11725    | 1 | 0.0 |         | P11725      |  |       |  |  |  | NP_006525683           |  | 10090 | P11725 P11725                                                     |
| 16091432  | 1 | 0.0 | Agp1    | 36091432    |  |       |  |  |  | XP_006534716           |  | 10090 | Q9QYG0 NDRG2_MOUSE                                                |
| Q9QYGO    | 1 | 0.0 | Ndr2    | NDRG2_MOUSE |  |       |  |  |  | XP_006521777           |  | 10090 |                                                                   |
| 4875325   | 1 | 0.0 | Atcam   | 4875325     |  |       |  |  |  | NP_038623              |  | 10090 | Q9CQ90 ATPL_MOUSE                                                 |
| Q9CQ90    | 1 | 0.0 | Atpl    | ATPL_MOUSE  |  |       |  |  |  | NP_031834              |  | 10090 | CYC_MOUSE P2097                                                   |
| P2097     | 0 | 0.0 | Cyc     | CYC_MOUSE   |  |       |  |  |  | NP_077153              |  | 10090 | AR2BP_MOUSE Q5D385                                                |
| Q5D385    | 1 | 0.0 | Ar2bp   | AR2BP_MOUSE |  |       |  |  |  | NP_080628              |  | 10090 | PTD_MOUSE Q9CR16                                                  |
| Q9CR16    | 1 | 0.0 | Ptd     | PTD_MOUSE   |  |       |  |  |  | NP_444401              |  | 10090 | C2WC_MOUSE Q9CR16                                                 |
| Q9CQ90    | 1 | 0.0 | C2wc    | C2WC_MOUSE  |  |       |  |  |  | NP_031533              |  | 10090 | Q9CQ90 Q9CQ90                                                     |
| Q96185    | 1 | 0.0 | Atpl    | ATPL_MOUSE  |  |       |  |  |  | NP_079843              |  | 10090 | CY1_MOUSE Q9D0M3                                                  |
| Q9D0M3    | 1 | 0.0 | Cyc1    | CY1_MOUSE   |  |       |  |  |  | NP_006520665           |  | 10090 | PKAK_MOUSE P87857                                                 |
| P47457    | 1 | 0.0 | Pkam    | PKAM_MOUSE  |  |       |  |  |  | NP_096768              |  | 10090 | Q9D0R2 EHEA_MOUSE                                                 |
| Q9YV50    | 0 | 0.0 | Crd1    | CRD1_MOUSE  |  |       |  |  |  | NP_075863              |  | 10090 | Q9CQA3 SDHB_MOUSE                                                 |
| Q9D0R2    | 1 | 0.0 | Ehea    | EHEA_MOUSE  |  |       |  |  |  | NP_079986              |  | 10090 | Q9CQ88 LCR1_MOUSE                                                 |
| Q9CQA3    | 1 | 0.0 | Sdhb    | SDHB_MOUSE  |  |       |  |  |  | NP_031531              |  | 10090 | ATPA_MOUSE Q9Y265                                                 |
| Q9CQ88    | 1 | 0.0 | Lcr1    | LCR1_MOUSE  |  |       |  |  |  | NP_031773              |  | 10090 | COX3A_MOUSE P12787                                                |
| Q9Y265    | 0 | 0.0 | Atpa    | ATPA_MOUSE  |  |       |  |  |  | NP_038826              |  | 10090 | Q6991 VDAC1_MOUSE                                                 |
| P12787    | 1 | 0.0 | Cox3a   | COX3A_MOUSE |  |       |  |  |  | XP_006497373           |  | 10090 | A2AK39 A2AK39_MOUSE                                               |
| Q6991     | 1 | 0.0 | Vdac1   | VDAC1_MOUSE |  |       |  |  |  | XP_006500997           |  | 10090 | ATF1_MOUSE Q9CQ97                                                 |
| A2AK39    | 0 | 0.0 | Atf1    | A2AK39      |  |       |  |  |  | NP_058054              |  | 10090 | ATPB_MOUSE P6480                                                  |
| Q9CQ97    | 1 | 0.0 | Atfbp   | ATFB_MOUSE  |  |       |  |  |  | NP_035016              |  | 10090 | NDU4A_MOUSE Q2425                                                 |
| P6480     | 1 | 0.0 | Ndu4a   | NDU4A_MOUSE |  |       |  |  |  | NP_032443              |  | 10090 | MTDB_MOUSE P62443                                                 |
| P62425    | 1 | 0.0 | Mdb2    | MTDB_MOUSE  |  |       |  |  |  | NP_079589              |  | 10090 | Q4FK74 ATPD_MOUSE Q4FK74_MOUSE                                    |
| Q4FK74    | 1 | 0.0 | Atpd    | ATPD_MOUSE  |  |       |  |  |  | NP_080175              |  | 10090 | QCR2_MOUSE Q5D87                                                  |
| Q5D87     | 1 | 0.0 | Lqcr2   | QCR2_MOUSE  |  |       |  |  |  | NP_035722              |  | 10090 | C3S557 TIM44_MOUSE                                                |
| C3S557    | 1 | 0.0 | Tim44   | TIM44_MOUSE |  |       |  |  |  | NP_058862              |  | 10090 | Q9YVM4 P6M12_MOUSE                                                |
| Q9YVM4    | 0 | 0.0 | P6m12   | P6M12_MOUSE |  |       |  |  |  | XP_006499309           |  | 10090 | R1K20_MOUSE Q5FWK3                                                |
| Q5FWK3    | 1 | 0.0 | Arhgap1 | R1K20_MOUSE |  |       |  |  |  | NP_076357              |  | 10090 | RYR2_MOUSE E9Q401                                                 |
| E9Q401    | 1 | 0.0 | Ryr2    | RYR2_MOUSE  |  |       |  |  |  | NP_035774              |  | 10090 | Q8S9W1 SA1F82_MOUSE                                               |
| Q8S9W1    | 1 | 0.0 | Ahy1    | SA1FB_MOUSE |  |       |  |  |  | NP_083157              |  | 10090 | CRTC_MOUSE QIU182                                                 |
| P759063   | 1 | 0.0 | Xorpe   | 9759063     |  |       |  |  |  | NP_001028522           |  | 10090 | Q8YV80 BANK1_MOUSE                                                |
| QIU182    | 1 | 0.0 | Cric2   | CRTC_MOUSE  |  | Cric2 |  |  |  | XP_006531197           |  | 10090 |                                                                   |
| Q8YV80    | 1 | 0.0 | Bank1   | BANK1_MOUSE |  |       |  |  |  | NP_006501360           |  | 10090 |                                                                   |
| 140375363 | 1 | 0.0 |         | 140375363   |  |       |  |  |  | NP_542120              |  | 10090 |                                                                   |
| 140340193 | 1 | 0.0 | Bak     | BOK_MOUSE   |  |       |  |  |  |                        |  | 10090 | C35425 BOK_MOUSE                                                  |
| C35425    | 1 | 0.0 | Bpg3    | BTBK_MOUSE  |  |       |  |  |  | NP_038657              |  | 10090 | ITBK_MOUSE P91237                                                 |
| P91237    | 1 | 0.0 | Zdhb    | ZDHKB_MOUSE |  |       |  |  |  | NP_058082 NP_006511696 |  | 10090 | ZDHKB_MOUSE Q9CPV7                                                |
| Q9CPV7    | 1 | 0.0 | Rhoa    | RHOA_MOUSE  |  |       |  |  |  | NP_084241              |  | 10090 | Q4VA16 Q4VA16_MOUSE EHEA_MOUSE                                    |
| Q4VA16    | 1 | 0.0 |         | 356523274   |  |       |  |  |  | XP_006498728           |  | 10090 |                                                                   |
| 356523274 | 1 | 0.0 |         | 356523274   |  |       |  |  |  | NP_031618              |  | 10090 | P28651 CAIRB_MOUSE                                                |
| 152649431 | 1 | 0.0 | Car8    | CAIRB_MOUSE |  |       |  |  |  | XP_006543910           |  | 10090 |                                                                   |
| P28651    | 1 | 0.0 |         | 207886107   |  |       |  |  |  | NP_038657              |  | 10090 | Q9Y127 Q9Y127_MOUSE                                               |
| 207886107 | 1 | 0.0 | Pla4    | Q9Y127      |  |       |  |  |  | NP_033736 NP_001258970 |  | 10090 | ACTS_MOUSE ACTS_PG P68134 ACTS_BOVIN ACTS_CHKCK ACTS_HUMAN        |
| Q9Y127    | 0 | 0.0 | Act1    | ACTS_MOUSE  |  |       |  |  |  | XP_006527061           |  | 10090 | Q9Y178 BRIN1_MOUSE                                                |
| P68134    | 1 | 0.0 | Brin1   | BRIN1_MOUSE |  |       |  |  |  | XP_017174982           |  | 10090 |                                                                   |
| Q9Y178    | 1 | 0.0 | Erln1   | 126421116   |  |       |  |  |  | NP_077225              |  | 10090 | PS1264 STX18_MOUSE                                                |
| 126421116 | 1 | 0.0 | Stx18   | STX18_MOUSE |  |       |  |  |  | NP_032880              |  | 10090 | KAPCA_MOUSE P05132                                                |
| P05132    | 1 | 0.0 | Pvkca   | KAPCA_MOUSE |  |       |  |  |  | NP_062653              |  | 10090 | NC1_MOUSE Q8RN76                                                  |
| Q8RN76    | 1 | 0.0 | Nc1     | NC1_MOUSE   |  |       |  |  |  | NP_006497998           |  | 10090 | A2A1P7 A2A1P7_MOUSE                                               |
| A2A1P7    | 1 | 0.0 | Gras1   | A2A1P7      |  |       |  |  |  | NP_062391              |  | 10090 | Q9J1A0 GRASP_MOUSE                                                |
| Q9J1A0    | 1 | 0.0 | Tamalin | GRASP_MOUSE |  |       |  |  |  | XP_133530              |  | 10090 | Q9QWV1-2                                                          |
| Q9QWV1-2  | 1 | 0.0 | Home2   | Q9QWV1-2    |  |       |  |  |  | XP_006540972           |  | 10090 | IBQ49_MOUSE IBQ49                                                 |
| IBQ49     | 1 | 0.0 | Home2   | IBQ49       |  |       |  |  |  | NP_006507246           |  | 10090 | GRM5_MOUSE Q9YVX5                                                 |
| Q9YVX5    | 0 | 0.0 | Grm5    | GRM5_MOUSE  |  |       |  |  |  | NP_620087              |  | 10090 | PTPA_MOUSE P58389                                                 |
| P58389    | 1 | 0.0 | Ptpa    | PTPA_MOUSE  |  |       |  |  |  | NP_036699              |  | 10090 | P09671 SCDM_MOUSE                                                 |
| P09671    | 1 | 0.0 | Sod2    | SCDM_MOUSE  |  |       |  |  |  | NP_055148              |  | 10090 | Q64337 SQTM_MOUSE                                                 |
| Q64337    | 1 | 0.0 | Sqtm1   | SQTM_MOUSE  |  |       |  |  |  | XP_006511873           |  | 10090 |                                                                   |
| 127476405 | 0 | 0.0 | Yyb     | 221476405   |  |       |  |  |  | NP_081005              |  | 10090 | COX41_MOUSE P19783                                                |
| 208576339 | 1 | 0.0 | Mrgp58  | 208576339   |  |       |  |  |  | NP_006502049           |  | 10090 |                                                                   |
| P19783    | 1 | 0.0 | Cox41   | COX41_MOUSE |  |       |  |  |  | NP_955010              |  | 10090 | WDTC1_MOUSE Q8QZK9                                                |
| 207514938 | 1 | 0.0 | Ela42   | 207514938   |  |       |  |  |  | NP_031599              |  | 10090 | Q8RS11_MOUSE Q8RS11                                               |
| Q8QZK9    | 1 | 0.0 | Wdct1   | WDTC1_MOUSE |  |       |  |  |  | NP_034617              |  | 10090 | Q9P900 ELAV_MOUSE                                                 |
| Q8RS11    | 1 | 0.0 | C1gpb   | Q8RS11      |  |       |  |  |  | NP_001177785 NP_067507 |  | 10090 | Q8RA51 DACT1_MOUSE                                                |
| Q9P900    | 1 | 0.0 | Ela43   | ELAV_MOUSE  |  |       |  |  |  |                        |  | 10090 | Q9WT18 BMA11_MOUSE                                                |
| Q8RA51    | 1 | 0.0 | Dact1   | DACT1_MOUSE |  | Dact1 |  |  |  | NP_766414              |  | 10090 | DACT2_MOUSE Q7TN08                                                |
| Q9WT18    | 1 | 0.0 | Bma11   | BMA11_MOUSE |  |       |  |  |  | NP_080452              |  | 10090 | Q9WRG2 PRF_MOUSE                                                  |
| Q7TN08    | 1 | 0.0 | Dact2   | DACT2_MOUSE |  |       |  |  |  | NP_071867              |  | 10090 | Q9JMF3 CIG13_MOUSE                                                |
| Q9WRG2    | 1 | 0.0 | Taf1    | PRF_MOUSE   |  |       |  |  |  | XP_017176869           |  | 10090 |                                                                   |
| Q9JMF3    | 1 | 0.0 | Gng13   | CIG13_MOUSE |  | Gng13 |  |  |  | NP_032169              |  | 10090 | RACK1_CHECK TRACK1_BOVIN TRACK1_MOUSE RACK1_PG RACK1_HUMAN P23388 |
| 1640682   | 1 | 0.0 | Dync11  | 1640682     |  |       |  |  |  |                        |  |       |                                                                   |
| P23388    | 1 | 0.0 | Rack1   | RACK1_CHECK |  |       |  |  |  |                        |  |       |                                                                   |





[illegible]
