# Supplementary material for: Protein Networks Associated with Native Metabotropic Glutamate 1 Receptors (mGlu1) in the Mouse Cerebellum
Source: MDPI journal article supplement (doi:10.3390/cells12091325), 2023-05-05
Supplement: s1 [file s1]

# Supplementary table S6: GO enrichment

FDR q-value is the p-value correction for multiple testing using the Benjamini and Hochberg method.

Enrichment (N, B, n, b) is defined as follows: N - is the total number of genes; B - is the total number of genes associated with a specific GO term

n - is the number of genes in the input list; b - is the number of genes in the intersection; Enrichment = (b/n) / (B/N)

| GO Term    | Description                                                  | P-value  | FDR q-value | Enrichment | N     | B   | n  | b  | Genes                                                                                                                                                                                                                                                                                                                                                                                                                                                                                                                                                                                       |
|------------|--------------------------------------------------------------|----------|-------------|------------|-------|-----|----|----|---------------------------------------------------------------------------------------------------------------------------------------------------------------------------------------------------------------------------------------------------------------------------------------------------------------------------------------------------------------------------------------------------------------------------------------------------------------------------------------------------------------------------------------------------------------------------------------------|
| GO:0048169 | regulation of long-term neuronal synaptic plasticity         | 3,59E-11 | 3,80E-08    | 53,62      | 10870 | 33  | 43 | 7  | [Dlg4 - discs, large homolog 4 (drosophila), Shank3 - sh3/ankyrin domain gene 3, Grin1 - glutamate receptor, ionotropic, nmda1 (zeta 1), Syngap1 - synaptic ras gtpase activating protein 1 homolog (rat), Grin2b - glutamate receptor, ionotropic, nmda2b (epsilon 2), Fmr1 - fragile x mental retardation syndrome 1, Camk2b - calcium/calmodulin-dependent protein kinase ii, beta]                                                                                                                                                                                                      |
| GO:0022898 | regulation of transmembrane transporter activity             | 2,93E-10 | 2,55E-07    | 13,5       | 10870 | 206 | 43 | 11 | [Prnp - prion protein, Dlg4 - discs, large homolog 4 (drosophila), Shank3 - sh3/ankyrin domain gene 3, Slc25a4 - solute carrier family 25 (mitochondrial carrier, adenine nucleotide translocator), member 4, Atp1b1 - atpase, na+/k+ transporting, beta 1 polypeptide, Htt - huntingtin, Ywhae - tyrosine 3-monooxygenase/tryptophan 5-monooxygenase activation protein, epsilon polypeptide, Atp1a2 - atpase, na+/k+ transporting, alpha 2 polypeptide, Vamp2 - vesicle-associated membrane protein 2, Cav3 - caveolin 3, Fmr1 - fragile x mental retardation syndrome 1]                 |
| GO:0051924 | regulation of calcium ion transport                          | 3,25E-10 | 2,68E-07    | 13,37      | 10870 | 208 | 43 | 11 | [Prnp - prion protein, Grin1 - glutamate receptor, ionotropic, nmda1 (zeta 1), Atp1b1 - atpase, na+/k+ transporting, beta 1 polypeptide, Htt - huntingtin, Ywhae - tyrosine 3-monooxygenase/tryptophan 5-monooxygenase activation protein, epsilon polypeptide, Atp1a2 - atpase, na+/k+ transporting, alpha 2 polypeptide, Gnao1 - guanine nucleotide binding protein, alpha o, Itpr1 - inositol 1,4,5-trisphosphate receptor 1, Homer3 - homer homolog 3 (drosophila), Cav3 - caveolin 3, Fmr1 - fragile x mental retardation syndrome 1]                                                  |
| GO:0050806 | positive regulation of synaptic transmission                 | 4,02E-10 | 3,13E-07    | 16         | 10870 | 158 | 43 | 10 | [Prkcg - protein kinase c, gamma, Dlg4 - discs, large homolog 4 (drosophila), Shank3 - sh3/ankyrin domain gene 3, Grin1 - glutamate receptor, ionotropic, nmda1 (zeta 1), Syt2 - synaptotagmin ii, Grin2b - glutamate receptor, ionotropic, nmda2b (epsilon 2), Vamp2 - vesicle-associated membrane protein 2, Fmr1 - fragile x mental retardation syndrome 1, Camk2b - calcium/calmodulin-dependent protein kinase ii, beta, Slc1a3 - solute carrier family 1 (glial high affinity glutamate transporter), member 3]                                                                       |
| GO:0007215 | glutamate receptor signaling pathway                         | 2,73E-09 | 1,49E-06    | 45,96      | 10870 | 33  | 43 | 6  | [Grin1 - glutamate receptor, ionotropic, nmda1 (zeta 1), Atp1a3 - atpase, na+/k+ transporting, alpha 3 polypeptide, Homer3 - homer homolog 3 (drosophila), Grin2b - glutamate receptor, ionotropic, nmda2b (epsilon 2), Fmr1 - fragile x mental retardation syndrome 1, Grm1 - glutamate receptor, metabotropic 1]                                                                                                                                                                                                                                                                          |
| GO:0007626 | locomotory behavior                                          | 3,14E-09 | 1,66E-06    | 12,96      | 10870 | 195 | 43 | 10 | [Dlg4 - discs, large homolog 4 (drosophila), Cnp - 2',3'-cyclic nucleotide 3' phosphodiesterase, Shank3 - sh3/ankyrin domain gene 3, Atp1a3 - atpase, na+/k+ transporting, alpha 3 polypeptide, Grin1 - glutamate receptor, ionotropic, nmda1 (zeta 1), Kcma1 - potassium large conductance calcium-activated channel, subfamily m, alpha member 1, Htt - huntingtin, Atp1a2 - atpase, na+/k+ transporting, alpha 2 polypeptide, Gnao1 - guanine nucleotide binding protein, alpha o, Grm1 - glutamate receptor, metabotropic 1]                                                            |
| GO:0051480 | regulation of cytosolic calcium ion concentration            | 8,81E-09 | 3,84E-06    | 11,65      | 10870 | 217 | 43 | 10 | [Dlg4 - discs, large homolog 4 (drosophila), Grin1 - glutamate receptor, ionotropic, nmda1 (zeta 1), Htt - huntingtin, Ywhae - tyrosine 3-monooxygenase/tryptophan 5-monooxygenase activation protein, epsilon polypeptide, Atp1a2 - atpase, na+/k+ transporting, alpha 2 polypeptide, Itpr1 - inositol 1,4,5-trisphosphate receptor 1, Grin2b - glutamate receptor, ionotropic, nmda2b (epsilon 2), Cav3 - caveolin 3, Gnb1 - guanine nucleotide binding protein (g protein), beta 1, Grm1 - glutamate receptor, metabotropic 1]                                                           |
| GO:0006874 | cellular calcium ion homeostasis                             | 1,01E-08 | 4,27E-06    | 9,66       | 10870 | 288 | 43 | 11 | [Dlg4 - discs, large homolog 4 (drosophila), Grin1 - glutamate receptor, ionotropic, nmda1 (zeta 1), Atp1b1 - atpase, na+/k+ transporting, beta 1 polypeptide, Htt - huntingtin, Ywhae - tyrosine 3-monooxygenase/tryptophan 5-monooxygenase activation protein, epsilon polypeptide, Atp1a2 - atpase, na+/k+ transporting, alpha 2 polypeptide, Itpr1 - inositol 1,4,5-trisphosphate receptor 1, Grin2b - glutamate receptor, ionotropic, nmda2b (epsilon 2), Cav3 - caveolin 3, Gnb1 - guanine nucleotide binding protein (g protein), beta 1, Grm1 - glutamate receptor, metabotropic 1] |
| GO:0050807 | regulation of synapse organization                           | 1,81E-08 | 6,10E-06    | 10,8       | 10870 | 234 | 43 | 10 | [Prnp - prion protein, Grid2 - glutamate receptor, ionotropic, delta 2, Dlg4 - discs, large homolog 4 (drosophila), Gpm6a - glycoprotein m6a, Shank3 - sh3/ankyrin domain gene 3, Ywhaz - tyrosine 3-monooxygenase/tryptophan 5-monooxygenase activation protein, zeta polypeptide, Grin1 - glutamate receptor, ionotropic, nmda1 (zeta 1), Grin2b - glutamate receptor, ionotropic, nmda2b (epsilon 2), Fmr1 - fragile x mental retardation syndrome 1, Camk2b - calcium/calmodulin-dependent protein kinase ii, beta]                                                                     |
| GO:1901214 | regulation of neuron death                                   | 4,52E-08 | 1,31E-05    | 8,35       | 10870 | 333 | 43 | 11 | [Prnp - prion protein, Grid2 - glutamate receptor, ionotropic, delta 2, Prkcg - protein kinase c, gamma, Syngap1 - synaptic ras gtpase activating protein 1 homolog (rat), Grin1 - glutamate receptor, ionotropic, nmda1 (zeta 1), Agap2 - arfgap with gtpase domain, ankyrin repeat and ph domain 2, Kcma1 - potassium large conductance calcium-activated channel, subfamily m, alpha member 1, Htt - huntingtin, Itpr1 - inositol 1,4,5-trisphosphate receptor 1, Grin2b - glutamate receptor, ionotropic, nmda2b (epsilon 2), Fmr1 - fragile x mental retardation syndrome 1]           |
| GO:1901019 | regulation of calcium ion transmembrane transporter activity | 1,85E-07 | 4,28E-05    | 23,33      | 10870 | 65  | 43 | 6  | [Atp1b1 - atpase, na+/k+ transporting, beta 1 polypeptide, Htt - huntingtin, Ywhae - tyrosine 3-monooxygenase/tryptophan 5-monooxygenase activation protein, epsilon polypeptide, Atp1a2 - atpase, na+/k+ transporting, alpha 2 polypeptide, Cav3 - caveolin 3, Fmr1 - fragile x mental retardation syndrome 1]                                                                                                                                                                                                                                                                             |
| GO:0007611 | learning or memory                                           | 2,63E-07 | 5,81E-05    | 9,68       | 10870 | 235 | 43 | 9  | [Prnp - prion protein, Shank3 - sh3/ankyrin domain gene 3, Syngap1 - synaptic ras gtpase activating protein 1 homolog (rat), Atp1a3 - atpase, na+/k+ transporting, alpha 3 polypeptide, Grin1 - glutamate receptor, ionotropic, nmda1 (zeta 1), Htt - huntingtin, Atp1a2 - atpase, na+/k+ transporting, alpha 2 polypeptide, Grin2b - glutamate receptor, ionotropic, nmda2b (epsilon 2), Slc12a5 - solute carrier family 12, member 5]                                                                                                                                                     |

|            |                                                            |          |          |        |       |      |    |    |                                                                                                                                                                                                                                                                                                                                                                                                                                                                                                                                                                                                                                                                                                                                                                                                                                                                                                                                                                                                                                                                                                                                                         |
|------------|------------------------------------------------------------|----------|----------|--------|-------|------|----|----|---------------------------------------------------------------------------------------------------------------------------------------------------------------------------------------------------------------------------------------------------------------------------------------------------------------------------------------------------------------------------------------------------------------------------------------------------------------------------------------------------------------------------------------------------------------------------------------------------------------------------------------------------------------------------------------------------------------------------------------------------------------------------------------------------------------------------------------------------------------------------------------------------------------------------------------------------------------------------------------------------------------------------------------------------------------------------------------------------------------------------------------------------------|
| GO:0007268 | chemical synaptic transmission                             | 3,45E-07 | 7,09E-05 | 11,56  | 10870 | 175  | 43 | 8  | [Grid2 - glutamate receptor, ionotropic, delta 2, Prkg - protein kinase c, gamma, Dlg4 - discs, large homolog 4 (drosophila), Grin1 - glutamate receptor, ionotropic, nmda1 (zeta 1), Kcnma1 - potassium large conductance calcium-activated channel, subfamily m, alpha member 1, Grin2b - glutamate receptor, ionotropic, nmda2b (epsilon 2), Slc12a5 - solute carrier family 12, member 5, Dlgap1 - discs, large (drosophila) homolog-associated protein 1]                                                                                                                                                                                                                                                                                                                                                                                                                                                                                                                                                                                                                                                                                          |
| GO:0008306 | associative learning                                       | 4,75E-07 | 9,01E-05 | 19,96  | 10870 | 76   | 43 | 6  | [Syngap1 - synaptic ras gtpase activating protein 1 homolog (rat), Grin1 - glutamate receptor, ionotropic, nmda1 (zeta 1), Atp1a3 - atpase, na+/k+ transporting, alpha 3 polypeptide, Htt - huntingtin, Atp1a2 - atpase, na+/k+ transporting, alpha 2 polypeptide, Grin2b - glutamate receptor, ionotropic, nmda2b (epsilon 2)]                                                                                                                                                                                                                                                                                                                                                                                                                                                                                                                                                                                                                                                                                                                                                                                                                         |
| GO:0007204 | positive regulation of cytosolic calcium ion concentration | 5,27E-07 | 9,88E-05 | 10,93  | 10870 | 185  | 43 | 8  | [Dlg4 - discs, large homolog 4 (drosophila), Grin1 - glutamate receptor, ionotropic, nmda1 (zeta 1), Htt - huntingtin, Itpr1 - inositol 1,4,5-trisphosphate receptor 1, Grin2b - glutamate receptor, ionotropic, nmda2b (epsilon 2), Cav3 - caveolin 3, Gnb1 - guanine nucleotide binding protein (g protein), beta 1, Grm1 - glutamate receptor, metabotropic 1]                                                                                                                                                                                                                                                                                                                                                                                                                                                                                                                                                                                                                                                                                                                                                                                       |
| GO:0050890 | cognition                                                  | 5,98E-07 | 1,11E-04 | 8,78   | 10870 | 259  | 43 | 9  | [Prnp - prion protein, Shank3 - sh3/ankyrin domain gene 3, Syngap1 - synaptic ras gtpase activating protein 1 homolog (rat), Atp1a3 - atpase, na+/k+ transporting, alpha 3 polypeptide, Grin1 - glutamate receptor, ionotropic, nmda1 (zeta 1), Htt - huntingtin, Atp1a2 - atpase, na+/k+ transporting, alpha 2 polypeptide, Grin2b - glutamate receptor, ionotropic, nmda2b (epsilon 2), Slc12a5 - solute carrier family 12, member 5]                                                                                                                                                                                                                                                                                                                                                                                                                                                                                                                                                                                                                                                                                                                 |
| GO:0006883 | cellular sodium ion homeostasis                            | 6,24E-07 | 1,14E-04 | 56,18  | 10870 | 18   | 43 | 4  | [Atp1a3 - atpase, na+/k+ transporting, alpha 3 polypeptide, Atp1b1 - atpase, na+/k+ transporting, beta 1 polypeptide, Atp1a2 - atpase, na+/k+ transporting, alpha 2 polypeptide, Slc1a3 - solute carrier family 1 (glial high affinity glutamate transporter), member 3]                                                                                                                                                                                                                                                                                                                                                                                                                                                                                                                                                                                                                                                                                                                                                                                                                                                                                |
| GO:0099537 | trans-synaptic signaling                                   | 7,28E-07 | 1,30E-04 | 10,48  | 10870 | 193  | 43 | 8  | [Grid2 - glutamate receptor, ionotropic, delta 2, Prkg - protein kinase c, gamma, Dlg4 - discs, large homolog 4 (drosophila), Grin1 - glutamate receptor, ionotropic, nmda1 (zeta 1), Kcnma1 - potassium large conductance calcium-activated channel, subfamily m, alpha member 1, Grin2b - glutamate receptor, ionotropic, nmda2b (epsilon 2), Slc12a5 - solute carrier family 12, member 5, Dlgap1 - discs, large (drosophila) homolog-associated protein 1]                                                                                                                                                                                                                                                                                                                                                                                                                                                                                                                                                                                                                                                                                          |
| GO:0031644 | regulation of neurological system process                  | 7,82E-07 | 1,36E-04 | 13,3   | 10870 | 133  | 43 | 7  | [Dlg4 - discs, large homolog 4 (drosophila), Shank3 - sh3/ankyrin domain gene 3, Grin1 - glutamate receptor, ionotropic, nmda1 (zeta 1), Homer3 - homer homolog 3 (drosophila), Fmr1 - fragile x mental retardation syndrome 1, Dlgap1 - discs, large (drosophila) homolog-associated protein 1, Grm1 - glutamate receptor, metabotropic 1]                                                                                                                                                                                                                                                                                                                                                                                                                                                                                                                                                                                                                                                                                                                                                                                                             |
| GO:0034613 | cellular protein localization                              | 1,48E-06 | 2,33E-04 | 4,37   | 10870 | 810  | 43 | 14 | [Syngap1 - synaptic ras gtpase activating protein 1 homolog (rat), Ywhaz - tyrosine 3-monooxygenase/tryptophan 5-monooxygenase activation protein, zeta polypeptide, Atp1b1 - atpase, na+/k+ transporting, beta 1 polypeptide, Grid2 - glutamate receptor, ionotropic, delta 2, Dlg4 - discs, large homolog 4 (drosophila), Shank3 - sh3/ankyrin domain gene 3, Grin1 - glutamate receptor, ionotropic, nmda1 (zeta 1), Htt - huntingtin, Ywhae - tyrosine 3-monooxygenase/tryptophan 5-monooxygenase activation protein, epsilon polypeptide, Grin2b - glutamate receptor, ionotropic, nmda2b (epsilon 2), Vamp2 - vesicle-associated membrane protein 2, Cav3 - caveolin 3, Ppp1r9b - protein phosphatase 1, regulatory subunit 9b, Tnik - traf2 and nck interacting kinase]                                                                                                                                                                                                                                                                                                                                                                          |
| GO:0008104 | protein localization                                       | 2,43E-06 | 3,59E-04 | 3,22   | 10870 | 1412 | 43 | 18 | [Syngap1 - synaptic ras gtpase activating protein 1 homolog (rat), Ywhaz - tyrosine 3-monooxygenase/tryptophan 5-monooxygenase activation protein, zeta polypeptide, Atp1b1 - atpase, na+/k+ transporting, beta 1 polypeptide, Ywhab - tyrosine 3-monooxygenase/tryptophan 5-monooxygenase activation protein, beta polypeptide, Grid2 - glutamate receptor, ionotropic, delta 2, Dlg4 - discs, large homolog 4 (drosophila), Shank3 - sh3/ankyrin domain gene 3, Grin1 - glutamate receptor, ionotropic, nmda1 (zeta 1), Htt - huntingtin, Ywhaq - tyrosine 3-monooxygenase/tryptophan 5-monooxygenase activation protein, theta polypeptide, Ywhae - tyrosine 3-monooxygenase/tryptophan 5-monooxygenase activation protein, epsilon polypeptide, Grin2b - glutamate receptor, ionotropic, nmda2b (epsilon 2), Ywhag - tyrosine 3-monooxygenase/tryptophan 5-monooxygenase activation protein, gamma polypeptide, Vamp2 - vesicle-associated membrane protein 2, Cav3 - caveolin 3, Ppp1r9b - protein phosphatase 1, regulatory subunit 9b, Dlgap1 - discs, large (drosophila) homolog-associated protein 1, Tnik - traf2 and nck interacting kinase] |
| GO:0035235 | ionotropic glutamate receptor signaling pathway            | 1,60E-05 | 1,95E-03 | 58,34  | 10870 | 13   | 43 | 3  | [Grin1 - glutamate receptor, ionotropic, nmda1 (zeta 1), Atp1a3 - atpase, na+/k+ transporting, alpha 3 polypeptide, Grin2b - glutamate receptor, ionotropic, nmda2b (epsilon 2)]                                                                                                                                                                                                                                                                                                                                                                                                                                                                                                                                                                                                                                                                                                                                                                                                                                                                                                                                                                        |
| GO:1900452 | regulation of long-term synaptic depression                | 2,54E-05 | 2,91E-03 | 50,56  | 10870 | 15   | 43 | 3  | [Grid2 - glutamate receptor, ionotropic, delta 2, Shank3 - sh3/ankyrin domain gene 3, Fmr1 - fragile x mental retardation syndrome 1]                                                                                                                                                                                                                                                                                                                                                                                                                                                                                                                                                                                                                                                                                                                                                                                                                                                                                                                                                                                                                   |
| GO:0010975 | regulation of neuron projection development                | 3,22E-05 | 3,55E-03 | 4,75   | 10870 | 532  | 43 | 10 | [Grid2 - glutamate receptor, ionotropic, delta 2, Dlg4 - discs, large homolog 4 (drosophila), Shank3 - sh3/ankyrin domain gene 3, Syngap1 - synaptic ras gtpase activating protein 1 homolog (rat), Grin1 - glutamate receptor, ionotropic, nmda1 (zeta 1), Syt2 - synaptotagmin ii, Itpr1 - inositol 1,4,5-trisphosphate receptor 1, Fmr1 - fragile x mental retardation syndrome 1, Camk2b - calcium/calmodulin-dependent protein kinase ii, beta, Tnik - traf2 and nck interacting kinase]                                                                                                                                                                                                                                                                                                                                                                                                                                                                                                                                                                                                                                                           |
| GO:0045664 | regulation of neuron differentiation                       | 4,20E-05 | 4,38E-03 | 4,15   | 10870 | 670  | 43 | 11 | [Grid2 - glutamate receptor, ionotropic, delta 2, Dlg4 - discs, large homolog 4 (drosophila), Shank3 - sh3/ankyrin domain gene 3, Syngap1 - synaptic ras gtpase activating protein 1 homolog (rat), Grin1 - glutamate receptor, ionotropic, nmda1 (zeta 1), Syt2 - synaptotagmin ii, Itpr1 - inositol 1,4,5-trisphosphate receptor 1, Ywhag - tyrosine 3-monooxygenase/tryptophan 5-monooxygenase activation protein, gamma polypeptide, Fmr1 - fragile x mental retardation syndrome 1, Camk2b - calcium/calmodulin-dependent protein kinase ii, beta, Tnik - traf2 and nck interacting kinase]                                                                                                                                                                                                                                                                                                                                                                                                                                                                                                                                                        |
| GO:0043113 | receptor clustering                                        | 4,28E-05 | 4,40E-03 | 20,22  | 10870 | 50   | 43 | 4  | [Dlg4 - discs, large homolog 4 (drosophila), Shank3 - sh3/ankyrin domain gene 3, Syngap1 - synaptic ras gtpase activating protein 1 homolog (rat), Grin2b - glutamate receptor, ionotropic, nmda2b (epsilon 2)]                                                                                                                                                                                                                                                                                                                                                                                                                                                                                                                                                                                                                                                                                                                                                                                                                                                                                                                                         |
| GO:1903279 | regulation of calcium:sodium antiporter activity           | 4,57E-05 | 4,64E-03 | 168,53 | 10870 | 3    | 43 | 2  | [Atp1b1 - atpase, na+/k+ transporting, beta 1 polypeptide, Atp1a2 - atpase, na+/k+ transporting, alpha 2 polypeptide]                                                                                                                                                                                                                                                                                                                                                                                                                                                                                                                                                                                                                                                                                                                                                                                                                                                                                                                                                                                                                                   |
| GO:0099601 | regulation of neurotransmitter receptor activity           | 5,01E-05 | 5,01E-03 | 19,45  | 10870 | 52   | 43 | 4  | [Dlg4 - discs, large homolog 4 (drosophila), Shank3 - sh3/ankyrin domain gene 3, Homer3 - homer homolog 3 (drosophila), Dlgap1 - discs, large (drosophila) homolog-associated protein 1]                                                                                                                                                                                                                                                                                                                                                                                                                                                                                                                                                                                                                                                                                                                                                                                                                                                                                                                                                                |
| GO:0010469 | regulation of signaling receptor activity                  | 6,01E-05 | 5,71E-03 | 11,81  | 10870 | 107  | 43 | 5  | [Dlg4 - discs, large homolog 4 (drosophila), Shank3 - sh3/ankyrin domain gene 3, Homer3 - homer homolog 3 (drosophila), Cav3 - caveolin 3, Dlgap1 - discs, large (drosophila) homolog-associated protein 1]                                                                                                                                                                                                                                                                                                                                                                                                                                                                                                                                                                                                                                                                                                                                                                                                                                                                                                                                             |

|            |                                                |          |          |       |       |      |    |    |                                                                                                                                                                                                                                                                                                                                                                                                                                                                                                                                                                                                                                                                                                                                                                                                                                                                                                                                                                                                                                  |
|------------|------------------------------------------------|----------|----------|-------|-------|------|----|----|----------------------------------------------------------------------------------------------------------------------------------------------------------------------------------------------------------------------------------------------------------------------------------------------------------------------------------------------------------------------------------------------------------------------------------------------------------------------------------------------------------------------------------------------------------------------------------------------------------------------------------------------------------------------------------------------------------------------------------------------------------------------------------------------------------------------------------------------------------------------------------------------------------------------------------------------------------------------------------------------------------------------------------|
| GO:0006836 | neurotransmitter transport                     | 6,29E-05 | 5,89E-03 | 11,7  | 10870 | 108  | 43 | 5  | [Ywhaz - tyrosine 3-monooxygenase/tryptophan 5-monooxygenase activation protein, zeta polypeptide, Syt2 - synaptotagmin ii, Atp1a2 - atpase, na+/k+ transporting, alpha 2 polypeptide, Slc1a3 - solute carrier family 1 (glial high affinity glutamate transporter), member 3, Grm1 - glutamate receptor, metabotropic 1]                                                                                                                                                                                                                                                                                                                                                                                                                                                                                                                                                                                                                                                                                                        |
| GO:0097688 | glutamate receptor clustering                  | 9,13E-05 | 8,14E-03 | 126,4 | 10870 | 4    | 43 | 2  | [Dlg4 - discs, large homolog 4 (drosophila), Shank3 - sh3/ankyrin domain gene 3]                                                                                                                                                                                                                                                                                                                                                                                                                                                                                                                                                                                                                                                                                                                                                                                                                                                                                                                                                 |
| GO:0097113 | AMPA glutamate receptor clustering             | 9,13E-05 | 8,29E-03 | 126,4 | 10870 | 4    | 43 | 2  | [Dlg4 - discs, large homolog 4 (drosophila), Shank3 - sh3/ankyrin domain gene 3]                                                                                                                                                                                                                                                                                                                                                                                                                                                                                                                                                                                                                                                                                                                                                                                                                                                                                                                                                 |
| GO:0001504 | neurotransmitter uptake                        | 1,25E-04 | 1,09E-02 | 30,33 | 10870 | 25   | 43 | 3  | [Atp1a2 - atpase, na+/k+ transporting, alpha 2 polypeptide, Slc1a3 - solute carrier family 1 (glial high affinity glutamate transporter), member 3, Grm1 - glutamate receptor, metabotropic 1]                                                                                                                                                                                                                                                                                                                                                                                                                                                                                                                                                                                                                                                                                                                                                                                                                                   |
| GO:0051668 | localization within membrane                   | 1,31E-04 | 1,12E-02 | 10,03 | 10870 | 126  | 43 | 5  | [Dlg4 - discs, large homolog 4 (drosophila), Shank3 - sh3/ankyrin domain gene 3, Syngap1 - synaptic ras gtpase activating protein 1 homolog (rat), Grin2b - glutamate receptor, ionotropic, nmda2b (epsilon 2), Vamp2 - vesicle-associated membrane protein 2]                                                                                                                                                                                                                                                                                                                                                                                                                                                                                                                                                                                                                                                                                                                                                                   |
| GO:0051960 | regulation of nervous system development       | 1,30E-04 | 1,13E-02 | 3,38  | 10870 | 898  | 43 | 12 | [Grid2 - glutamate receptor, ionotropic, delta 2, Dlg4 - discs, large homolog 4 (drosophila), Shank3 - sh3/ankyrin domain gene 3, Syngap1 - synaptic ras gtpase activating protein 1 homolog (rat), Ywhaz - tyrosine 3-monooxygenase/tryptophan 5-monooxygenase activation protein, zeta polypeptide, Grin1 - glutamate receptor, ionotropic, nmda1 (zeta 1), Syt2 - synaptotagmin ii, Itpr1 - inositol 1,4,5-trisphosphate receptor 1, Ywhag - tyrosine 3-monooxygenase/tryptophan 5-monooxygenase activation protein, gamma polypeptide, Fmr1 - fragile x mental retardation syndrome 1, Camk2b - calcium/calmodulin-dependent protein kinase ii, beta, Tnik - traf2 and nck interacting kinase]                                                                                                                                                                                                                                                                                                                               |
| GO:0006605 | protein targeting                              | 1,51E-04 | 1,27E-02 | 9,72  | 10870 | 130  | 43 | 5  | [Ywhaz - tyrosine 3-monooxygenase/tryptophan 5-monooxygenase activation protein, zeta polypeptide, Ywhaq - tyrosine 3-monooxygenase/tryptophan 5-monooxygenase activation protein, theta polypeptide, Ywhae - tyrosine 3-monooxygenase/tryptophan 5-monooxygenase activation protein, epsilon polypeptide, Ywhag - tyrosine 3-monooxygenase/tryptophan 5-monooxygenase activation protein, gamma polypeptide, Ywhab - tyrosine 3-monooxygenase/tryptophan 5-monooxygenase activation protein, beta polypeptide]                                                                                                                                                                                                                                                                                                                                                                                                                                                                                                                  |
| GO:0035304 | regulation of protein dephosphorylation        | 1,80E-04 | 1,45E-02 | 14,04 | 10870 | 72   | 43 | 4  | [Htt - huntingtin, Ywhae - tyrosine 3-monooxygenase/tryptophan 5-monooxygenase activation protein, epsilon polypeptide, Ppp1r9b - protein phosphatase 1, regulatory subunit 9b, Ywhab - tyrosine 3-monooxygenase/tryptophan 5-monooxygenase activation protein, beta polypeptide]                                                                                                                                                                                                                                                                                                                                                                                                                                                                                                                                                                                                                                                                                                                                                |
| GO:0050848 | regulation of calcium-mediated signaling       | 2,21E-04 | 1,73E-02 | 13,3  | 10870 | 76   | 43 | 4  | [Prnp - prion protein, Htt - huntingtin, Homer3 - homer homolog 3 (drosophila), Itpr1 - inositol 1,4,5-trisphosphate receptor 1]                                                                                                                                                                                                                                                                                                                                                                                                                                                                                                                                                                                                                                                                                                                                                                                                                                                                                                 |
| GO:0060079 | excitatory postsynaptic potential              | 2,90E-04 | 2,16E-02 | 22,98 | 10870 | 33   | 43 | 3  | [Grid2 - glutamate receptor, ionotropic, delta 2, Grin1 - glutamate receptor, ionotropic, nmda1 (zeta 1), Grin2b - glutamate receptor, ionotropic, nmda2b (epsilon 2)]                                                                                                                                                                                                                                                                                                                                                                                                                                                                                                                                                                                                                                                                                                                                                                                                                                                           |
| GO:0009966 | regulation of signal transduction              | 3,26E-04 | 2,37E-02 | 2,18  | 10870 | 2204 | 43 | 19 | [Prnp - prion protein, Fancd2 - fanconi anemia, complementation group d2, Syngap1 - synaptic ras gtpase activating protein 1 homolog (rat), Ywhaz - tyrosine 3-monooxygenase/tryptophan 5-monooxygenase activation protein, zeta polypeptide, Agap2 - arfgap with gtpase domain, ankyrin repeat and ph domain 2, Ywhab - tyrosine 3-monooxygenase/tryptophan 5-monooxygenase activation protein, beta polypeptide, Camk2b - calcium/calmodulin-dependent protein kinase ii, beta, Dlg4 - discs, large homolog 4 (drosophila), Shank3 - sh3/ankyrin domain gene 3, Grin1 - glutamate receptor, ionotropic, nmda1 (zeta 1), Htt - huntingtin, Itpr1 - inositol 1,4,5-trisphosphate receptor 1, Homer3 - homer homolog 3 (drosophila), Cav3 - caveolin 3, Grin2b - glutamate receptor, ionotropic, nmda2b (epsilon 2), Ppp1r9b - protein phosphatase 1, regulatory subunit 9b, Dlgap1 - discs, large (drosophila) homolog-associated protein 1, Tnik - traf2 and nck interacting kinase, Grm1 - glutamate receptor, metabotropic 1] |
| GO:0019722 | calcium-mediated signaling                     | 4,61E-04 | 3,22E-02 | 10,99 | 10870 | 92   | 43 | 4  | [Prnp - prion protein, Atp1b1 - atpase, na+/k+ transporting, beta 1 polypeptide, Ppp1r9b - protein phosphatase 1, regulatory subunit 9b, Grm1 - glutamate receptor, metabotropic 1]                                                                                                                                                                                                                                                                                                                                                                                                                                                                                                                                                                                                                                                                                                                                                                                                                                              |
| GO:0019220 | regulation of phosphate metabolic process      | 5,64E-04 | 3,74E-02 | 2,57  | 10870 | 1377 | 43 | 14 | [Prnp - prion protein, Syngap1 - synaptic ras gtpase activating protein 1 homolog (rat), Ywhaz - tyrosine 3-monooxygenase/tryptophan 5-monooxygenase activation protein, zeta polypeptide, Agap2 - arfgap with gtpase domain, ankyrin repeat and ph domain 2, Ywhab - tyrosine 3-monooxygenase/tryptophan 5-monooxygenase activation protein, beta polypeptide, Dlg4 - discs, large homolog 4 (drosophila), Htt - huntingtin, Ywhae - tyrosine 3-monooxygenase/tryptophan 5-monooxygenase activation protein, epsilon polypeptide, Grin2b - glutamate receptor, ionotropic, nmda2b (epsilon 2), Cav3 - caveolin 3, Ppp1r9b - protein phosphatase 1, regulatory subunit 9b, Fmr1 - fragile x mental retardation syndrome 1, Grm1 - glutamate receptor, metabotropic 1, Tnik - traf2 and nck interacting kinase]                                                                                                                                                                                                                   |
| GO:0048814 | regulation of dendrite morphogenesis           | 7,06E-04 | 4,39E-02 | 9,82  | 10870 | 103  | 43 | 4  | [Shank3 - sh3/ankyrin domain gene 3, Grin1 - glutamate receptor, ionotropic, nmda1 (zeta 1), Camk2b - calcium/calmodulin-dependent protein kinase ii, beta, Tnik - traf2 and nck interacting kinase]                                                                                                                                                                                                                                                                                                                                                                                                                                                                                                                                                                                                                                                                                                                                                                                                                             |
| GO:0000165 | MAPK cascade                                   | 7,59E-04 | 4,59E-02 | 9,63  | 10870 | 105  | 43 | 4  | [Shank3 - sh3/ankyrin domain gene 3, Ywhaz - tyrosine 3-monooxygenase/tryptophan 5-monooxygenase activation protein, zeta polypeptide, Ywhae - tyrosine 3-monooxygenase/tryptophan 5-monooxygenase activation protein, epsilon polypeptide, Tnik - traf2 and nck interacting kinase]                                                                                                                                                                                                                                                                                                                                                                                                                                                                                                                                                                                                                                                                                                                                             |
| GO:0023014 | signal transduction by protein phosphorylation | 7,59E-04 | 4,61E-02 | 9,63  | 10870 | 105  | 43 | 4  | [Shank3 - sh3/ankyrin domain gene 3, Ywhaz - tyrosine 3-monooxygenase/tryptophan 5-monooxygenase activation protein, zeta polypeptide, Ywhae - tyrosine 3-monooxygenase/tryptophan 5-monooxygenase activation protein, epsilon polypeptide, Tnik - traf2 and nck interacting kinase]                                                                                                                                                                                                                                                                                                                                                                                                                                                                                                                                                                                                                                                                                                                                             |
| GO:0097106 | postsynaptic density organization              | 9,84E-04 | 5,67E-02 | 42,13 | 10870 | 12   | 43 | 2  | [Shank3 - sh3/ankyrin domain gene 3, Syngap1 - synaptic ras gtpase activating protein 1 homolog (rat)]                                                                                                                                                                                                                                                                                                                                                                                                                                                                                                                                                                                                                                                                                                                                                                                                                                                                                                                           |
